# Supplementary material
Source: publisher figshare collection journal article supplement (https://acs.figshare.com/ndownloader/files/10505620)
Supplement: Supplementary file 1 [file 10505620]

# **Diastereo- and Enantioselective Synthesis of Spirooxindoles with Contiguous Tetrasubstituted Stereocenters via Catalytic Coupling of Two Tertiary Radicals**

Zhi-Yong Song,<sup>a,b</sup> Kun-Quan Chen,<sup>a,b</sup> Xiang-Yu Chen<sup>a</sup> and Song Ye<sup>a,b</sup> \*

<sup>a</sup> Beijing National Laboratory for Molecular Sciences, CAS Key Laboratory of  
Molecular Recognition and Function, CAS Research/Education Center for Excellence  
in Molecular Sciences, Institute of Chemistry, Chinese Academy of Sciences, Beijing  
100190, China.

<sup>b</sup> University of Chinese Academy of Sciences, Beijing 100049, China.

E-mail: [songye@iccas.ac.cn](mailto:songye@iccas.ac.cn)

## **Table of Contents**

|                                                              |     |
|--------------------------------------------------------------|-----|
| Part I NMR Spectra.....                                      | S2  |
| Part II HPLC Spectra .....                                   | S17 |
| Part III X-ray crystallographic data of cycloadduct 3f ..... | S32 |

# Part I NMR Spectra

szy-116

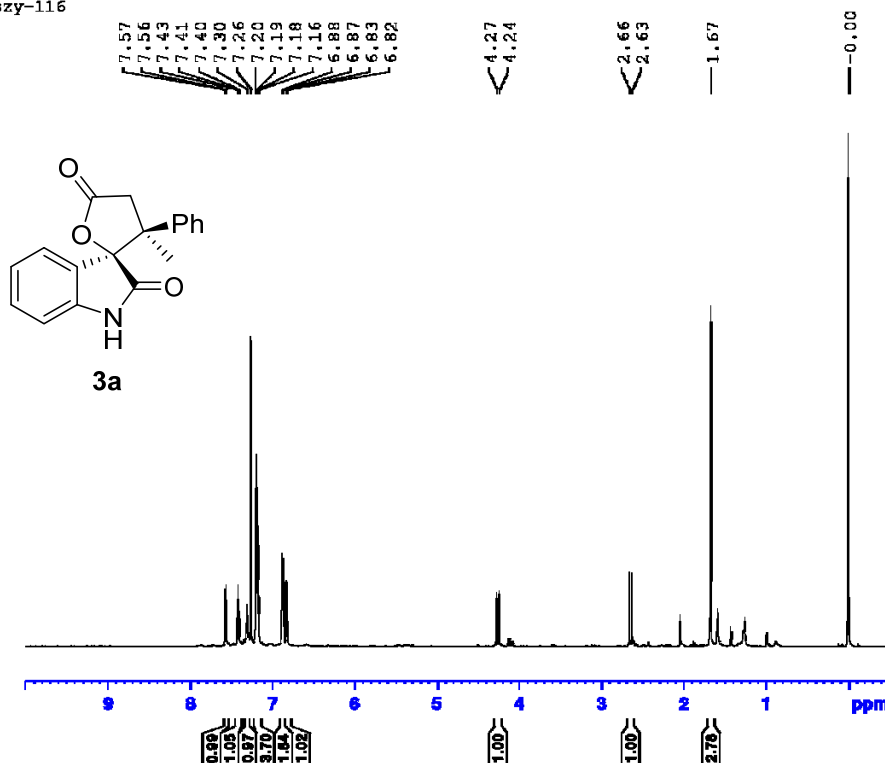

Current Data Parameters  
NAME H NMR  
EXPNO 56  
PROCNO 1

F2 - Acquisition Parameters  
Date\_ 20160321  
Time 17.11 h  
INSTRUM spect  
PROBHD 5 mm CPBBO BB  
PULPROG zg30  
TD 65536  
SOLVENT CDCl3  
NS 16  
DS 2  
SWH 10000.000 Hz  
FIDRES 0.305176 Hz  
AQ 3.2767999 sec  
RG 31.72  
DW 50.000 usec  
DE 6.50 usec  
TE 298.0 K  
D1 1.00000000 sec  
TDO 1  
SFO1 500.1330895 MHz  
NUC1 1H  
P1 10.60 usec  
PLW1 20.00000000 W

F2 - Processing parameters  
SI 65536  
SF 500.1300120 MHz  
WDW EM  
SSB 0  
LB 0.30 Hz  
GB 0  
PC 1.00

szy-116

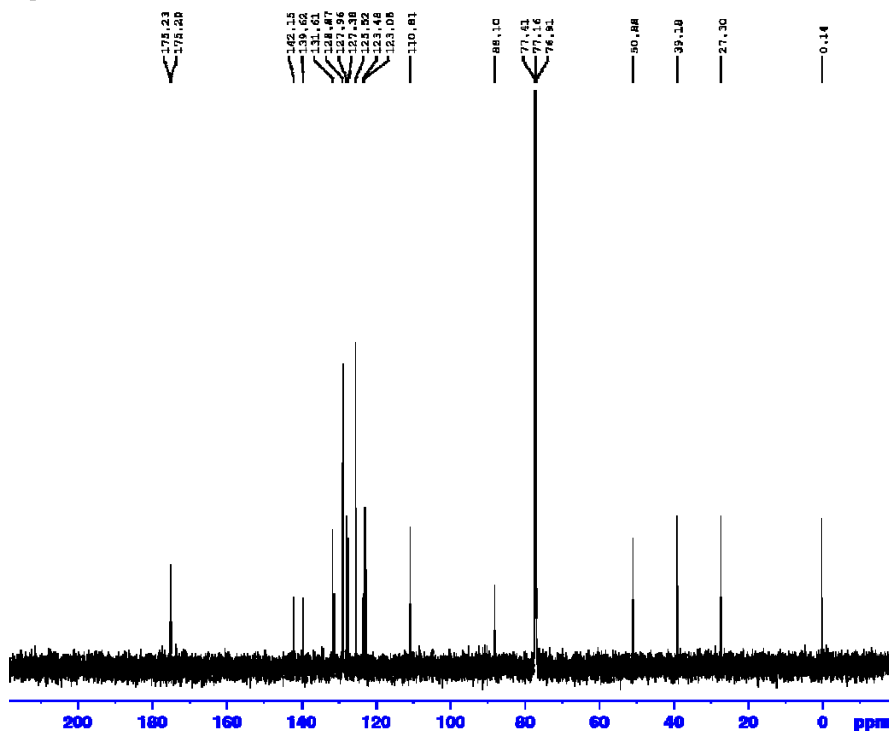

Current Data Parameters  
NAME c  
EXPNO 57  
PROCNO 1

F2 - Acquisition Parameters  
Date\_ 20160321  
Time 17.16 h  
INSTRUM spect  
PROBHD 5 mm CPBBO BB  
PULPROG zgpg30  
TD 65536  
SOLVENT CDCl3  
NS 133  
DS 4  
SWH 29761.904 Hz  
FIDRES 0.308261 Hz  
AQ 1.1019048 sec  
RG 132.89  
DW 16.800 usec  
DE 18.00 usec  
TE 298.0 K  
D1 2.00000000 sec  
d11 0.03000000 sec  
DELTA 1.89999998 sec  
TDO 1  
SFO1 125.7703637 MHz  
NUC1 13C  
P1 9.80 usec  
PLW1 57.00000000 W  
SFO2 500.1320005 MHz  
NUC2 1H  
CPDPRG2 waltz16  
PCPD2 80.00 usec  
PLW2 20.00000000 W  
PLW12 0.35778001 W  
PLW13 0.22898000 W

F2 - Processing parameters  
SI 32768  
SF 125.7577720 MHz  
WDW EM  
SSB 0  
LB 1.00 Hz  
GB 0  
PC 1.40

152

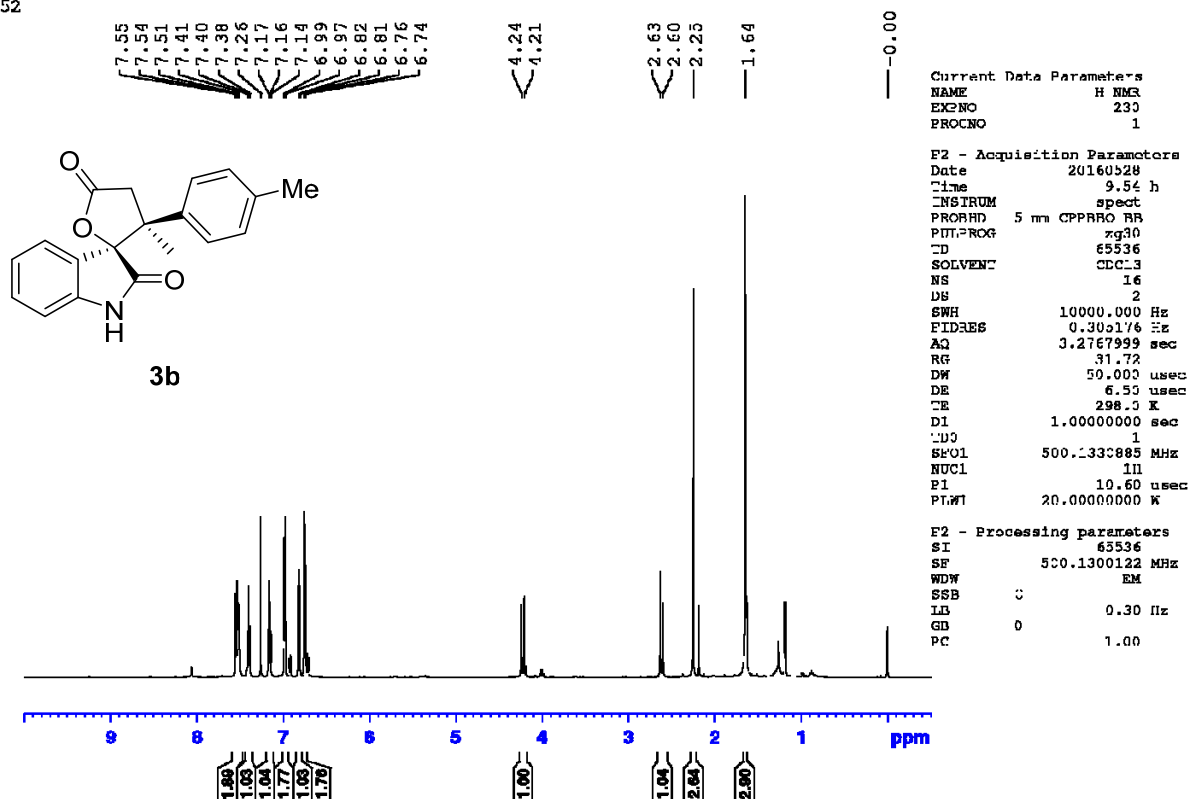

152

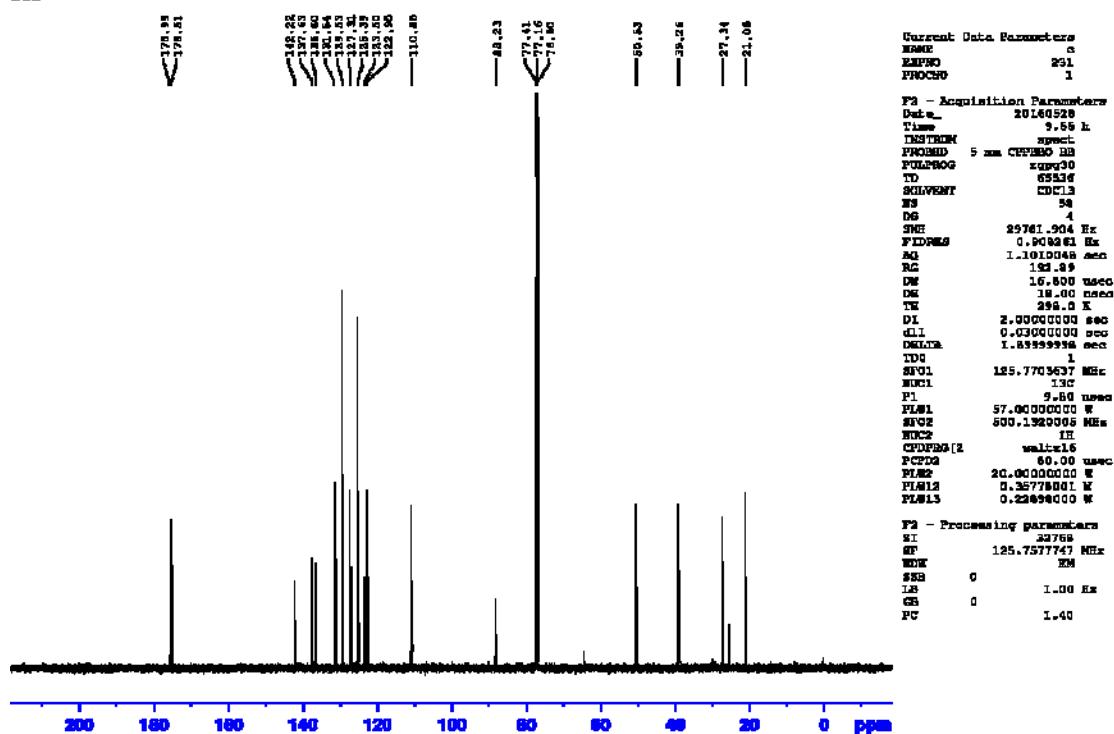

153

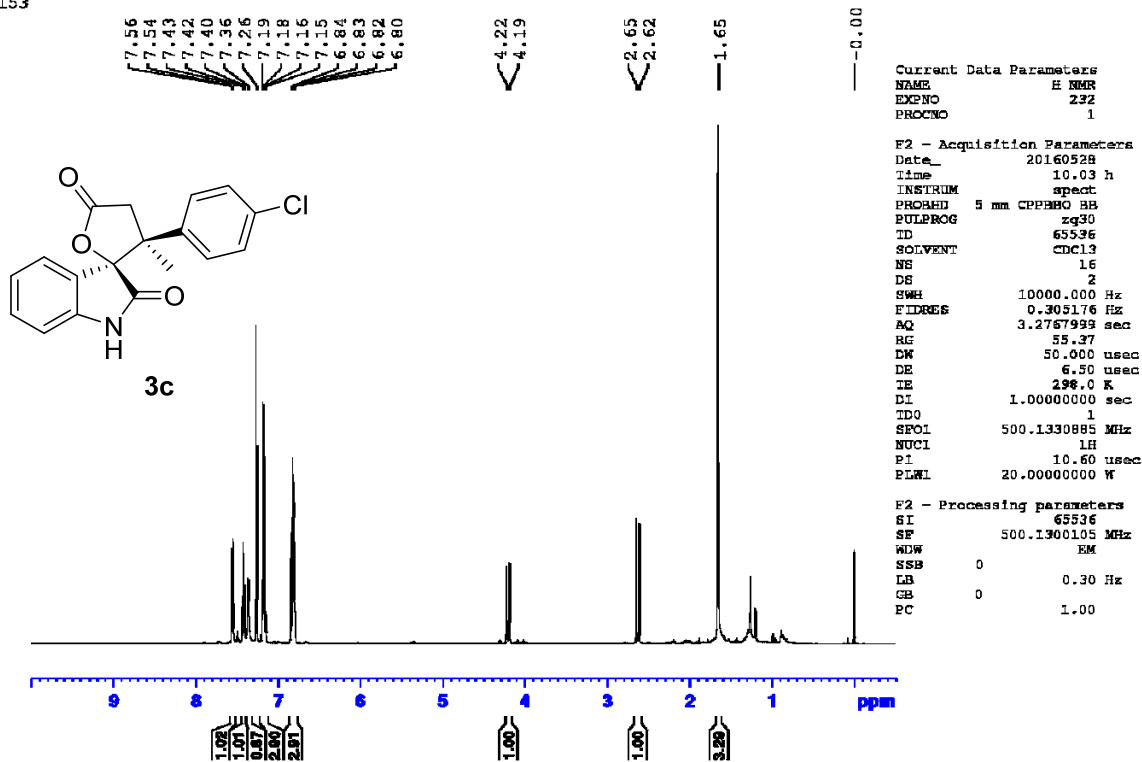

153

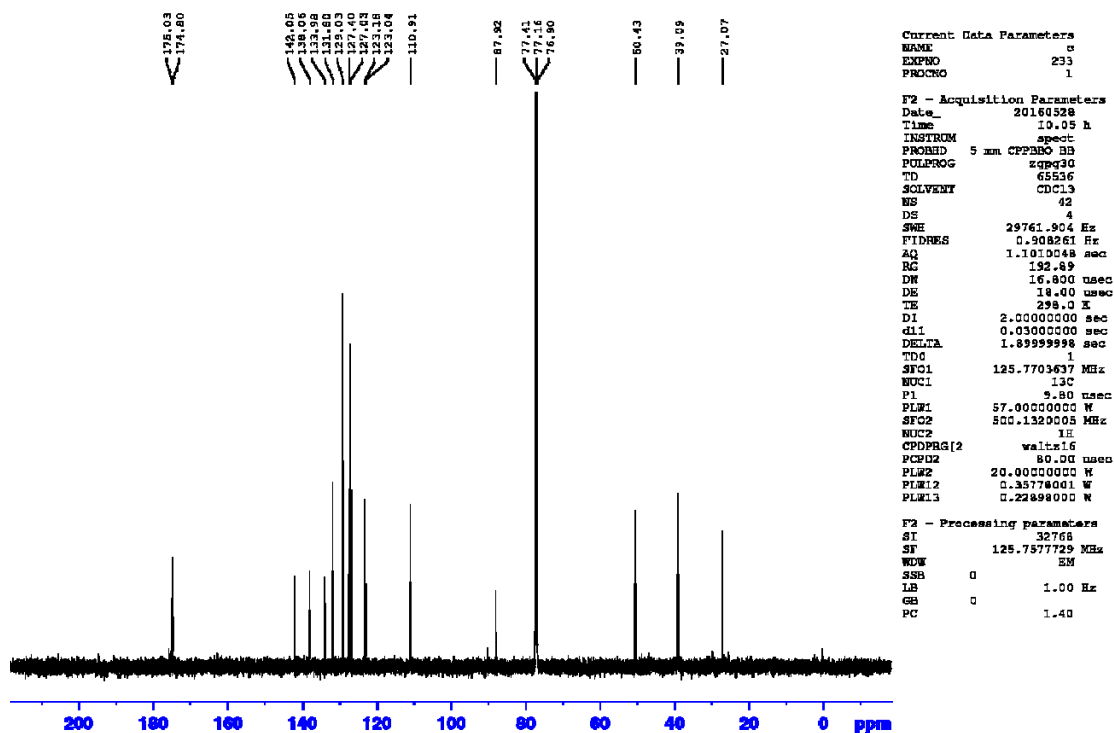

154

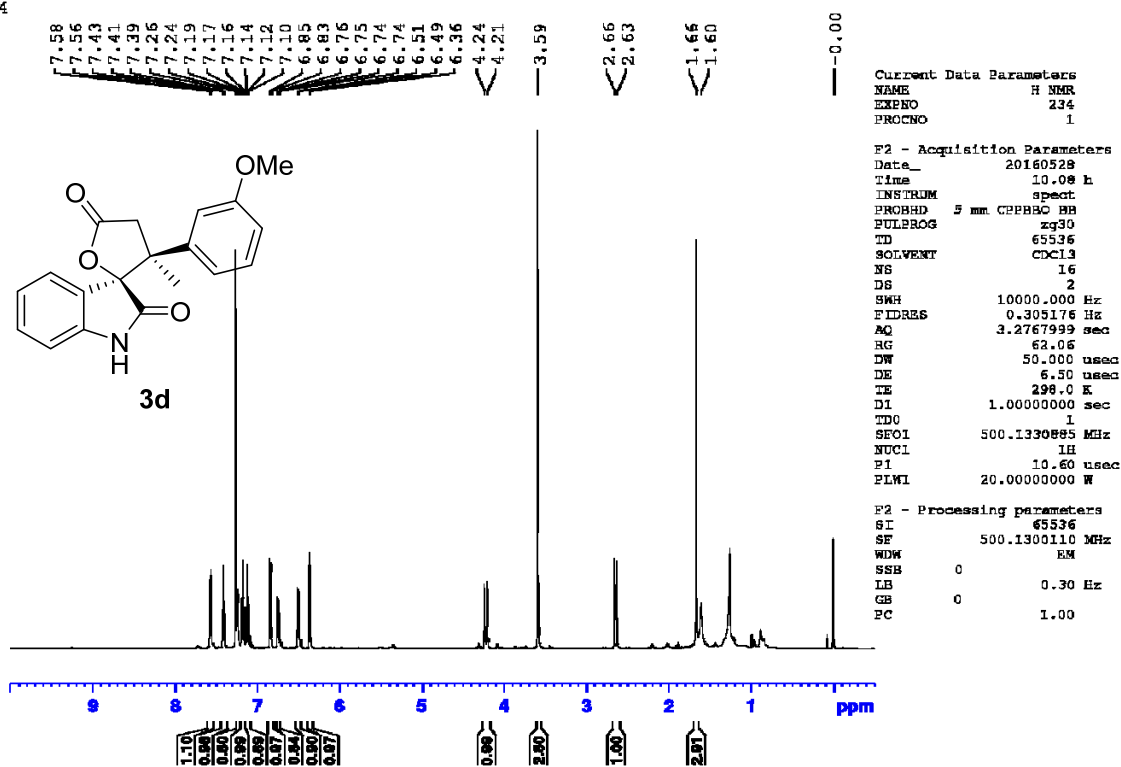

154

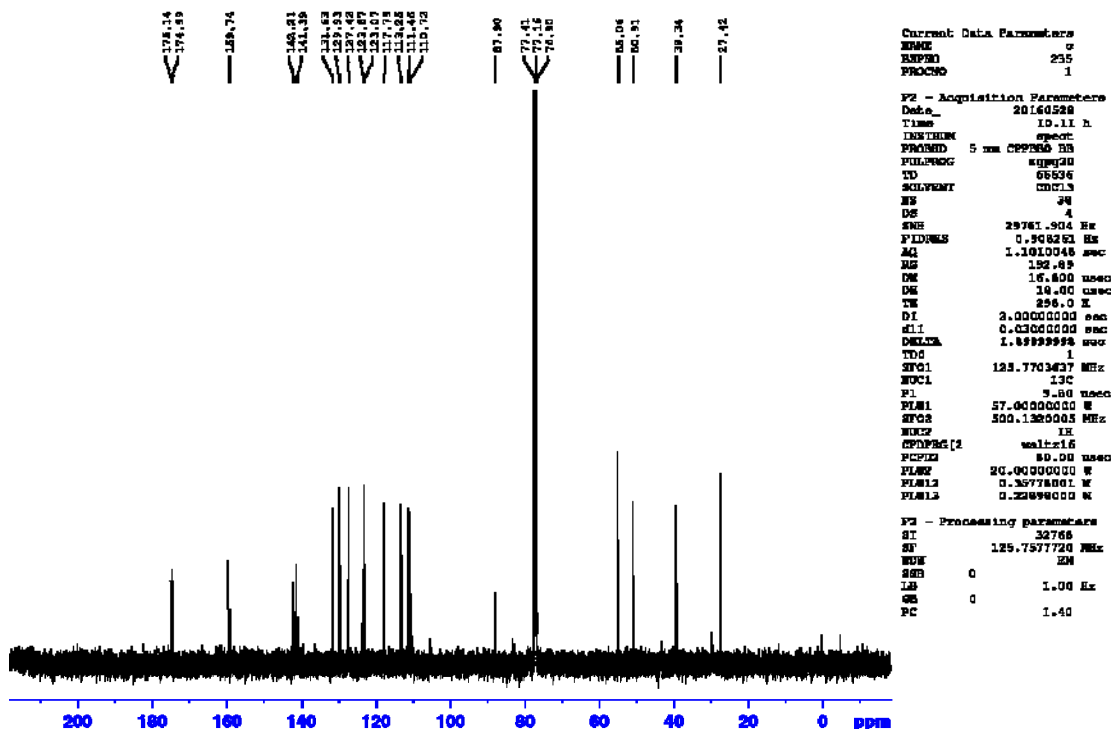



155-1

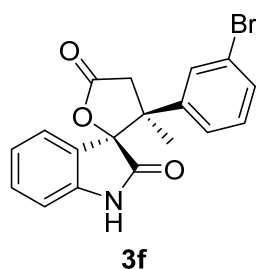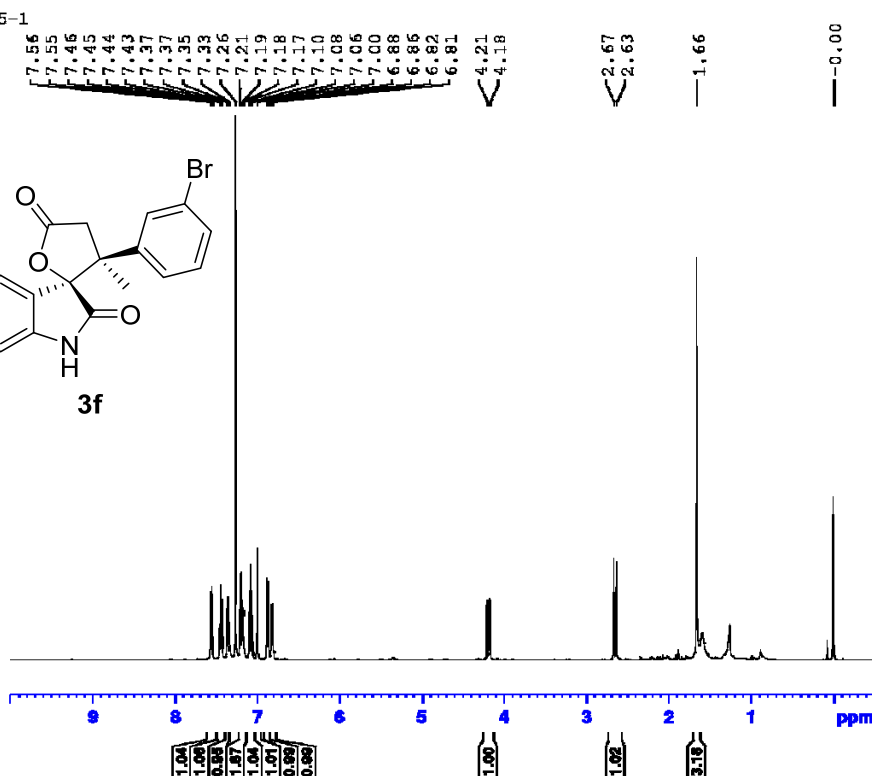

Current Data Parameters

|        |       |
|--------|-------|
| NAME   | H NMR |
| EXNO   | 236   |
| PROCNO | 1     |

F2 - Acquisition Parameters

|         |                 |
|---------|-----------------|
| Date_   | 20160528        |
| Time    | 10.15 h         |
| INSTRUM | spect           |
| PROBHD  | 5 mm CBBBO BB   |
| PULPROG | zg30            |
| TD      | 65536           |
| SOLVENT | CDCl3           |
| NS      | 16              |
| DS      | 2               |
| SWH     | 10000.000 Hz    |
| FIDRES  | 0.305176 Hz     |
| AQ      | 3.2767999 sec   |
| RG      | 63.06           |
| DW      | 50.000 used     |
| DE      | 6.50 used       |
| TE      | 298.0 K         |
| D1      | 1.00000000 sec  |
| TD0     | 1               |
| SFO1    | 500.1330885 MHz |
| NUC1    | 1H              |
| P1      | 10.60 usec      |
| PL1     | 20.00000000 W   |

F2 - Processing parameters

|     |                 |
|-----|-----------------|
| SI  | 65536           |
| SF  | 500.1300111 MHz |
| WDW | EM              |
| SSB | 0               |
| LB  | 0.30 Hz         |
| GB  | 0               |
| PC  | 1.00            |

155

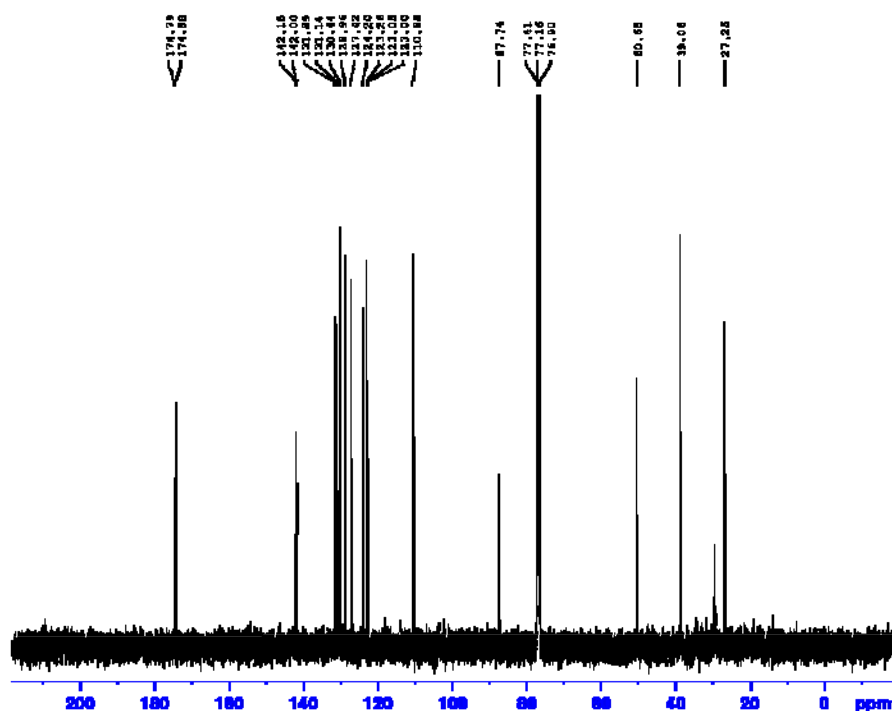

Current Data Parameters

|        |    |
|--------|----|
| NAME   | c  |
| EXNO   | 20 |
| PROCNO | 1  |

F2 - Acquisition Parameters

|         |               |
|---------|---------------|
| Date_   | 20160528      |
| Time    | 13.47         |
| INSTRUM | spect         |
| PROBHD  | 5 mm CBBBO BB |
| PULPROG | zgpg30        |
| TD      | 65536         |
| SOLVENT | CDCl3         |
| NS      | 233           |
| DS      | 4             |

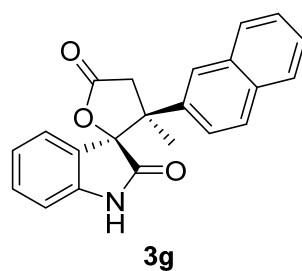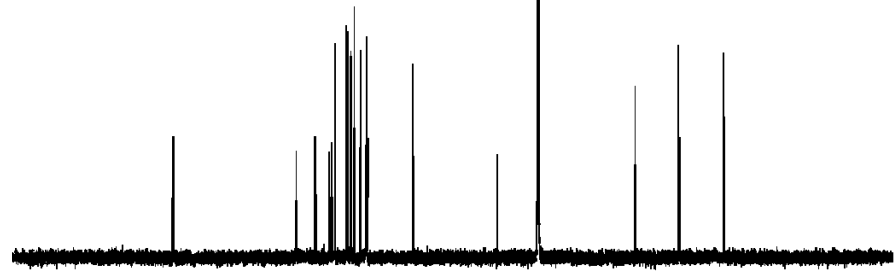



157

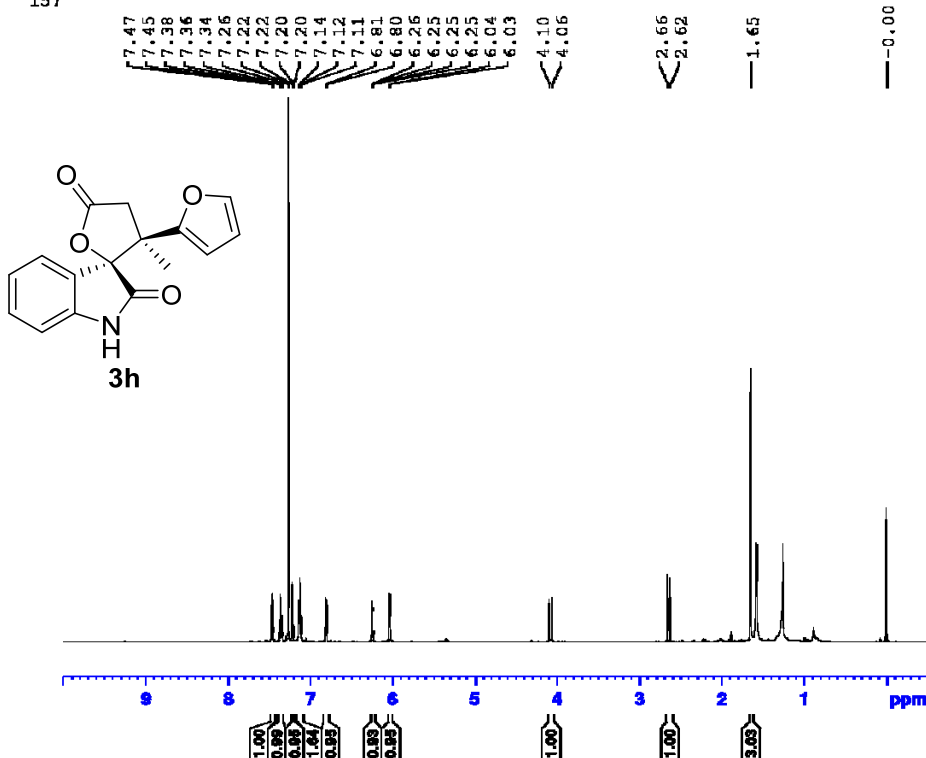

Current Data Parameters  
NAME H NMR  
EXNO 245  
PROCNO 1

F2 - Acquisition Parameters  
Date\_ 20160530  
Time 21.34 h  
INSTRUM spect  
PROBHD 5 mm CPMBO BB  
PULPROG zg30  
TD 65536  
SOLVENT CDCl3  
NS 16  
DS 2  
SWH 10000.000 Hz  
FIDRES 0.305176 Hz  
AQ 3.2767999 sec  
RG 31.72  
DW 50.000 usec  
DE 6.50 usec  
TE 298.0 K  
D1 1.00000000 sec  
TD0 1  
SFO1 500.1330885 MHz  
NUC1 1H  
P1 10.60 usec  
PL1 20.00000000 W

F2 - Processing parameters  
SI 65536  
SF 500.1300114 MHz  
WDW EM  
SSB 0  
LB 0.30 Hz  
GB 0  
PC 1.00

157

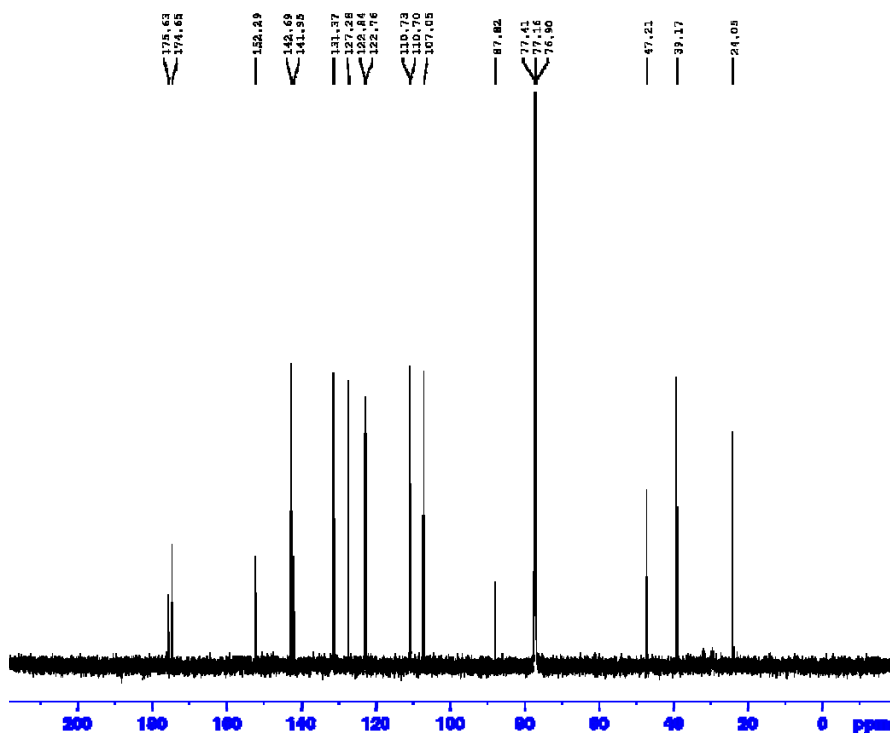

Current Data Parameters  
NAME s  
EXNO 22  
PROCNO 1

F2 - Acquisition Parameters  
Date\_ 20160126  
Time 13.32  
INSTRUM spect  
PROBHD 5 mm CPMBO BB  
PULPROG zgpg30  
TD 65536  
SOLVENT CDCl3  
NS 276  
DS 4  
SWH 29761.904 Hz  
FIDRES 0.454131 Hz  
AQ 1.1010048 sec  
RG 132.69  
DW 16.800 usec  
DE 18.00 usec  
TE 298.1 K  
D1 2.00000000 sec  
D11 0.03000000 sec  
TD0 1

CHANNEL F1  
SFO1 125.7703637 MHz  
NUC1 13C  
P1 9.80 usec  
PL1 57.00000000 W

CHANNEL F2  
SFO2 500.1320005 MHz  
NUC2 1H  
CPDPRG2 waltz16  
PCPD2 80.00 usec  
PLF2 20.00000000 W  
PLF12 0.35778001 W  
PLF13 0.22898000 W

F2 - Processing parameters  
SI 32768  
SF 125.7577723 MHz  
WDW EM  
SSB 0  
LB 1.00 Hz  
GB 0  
PC 1.40

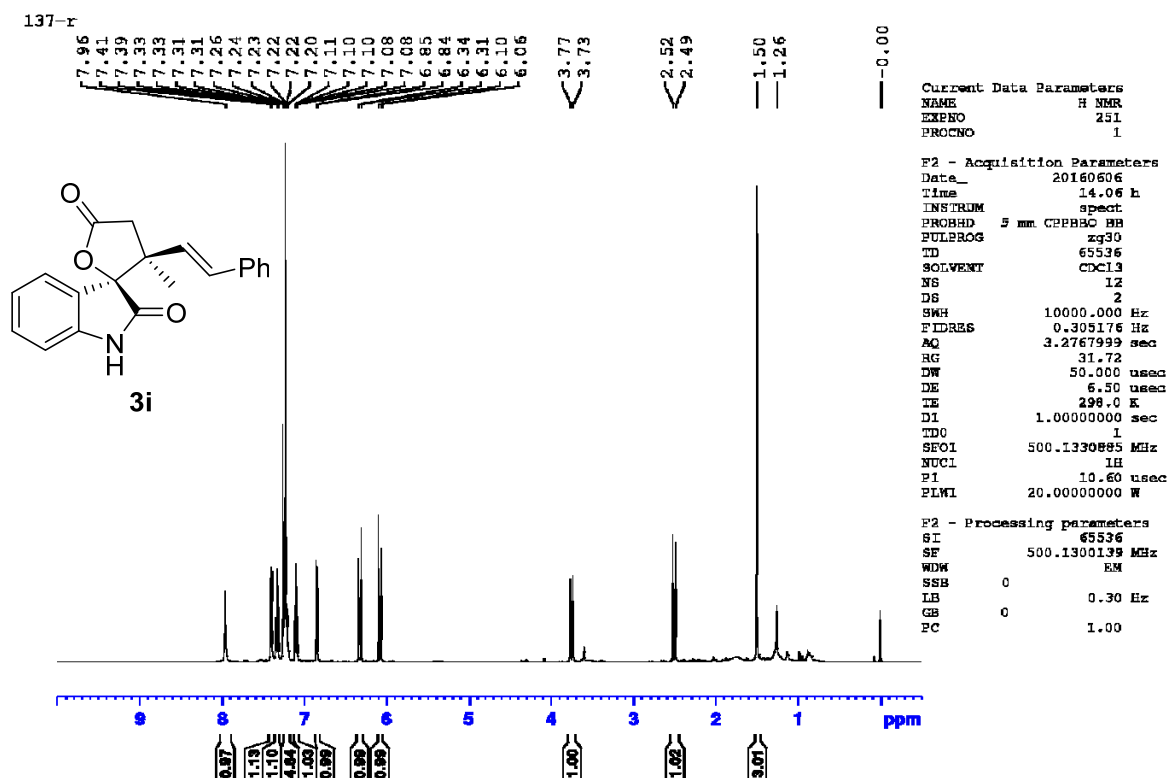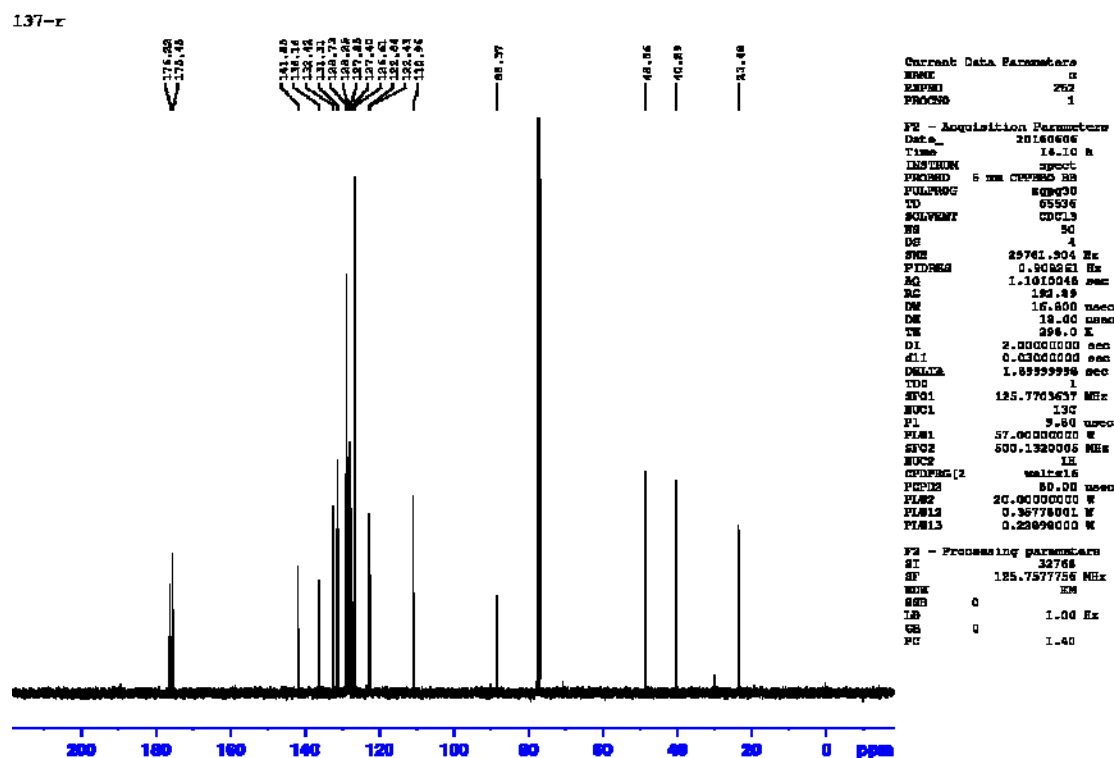

142

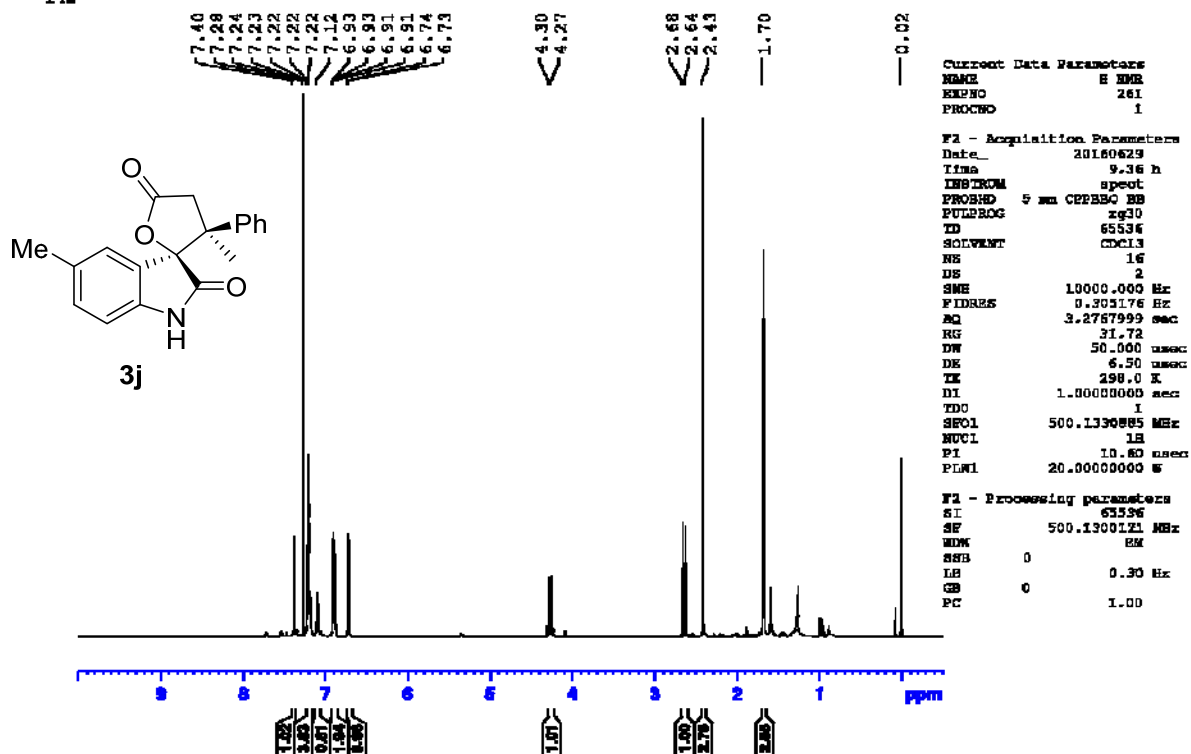

142

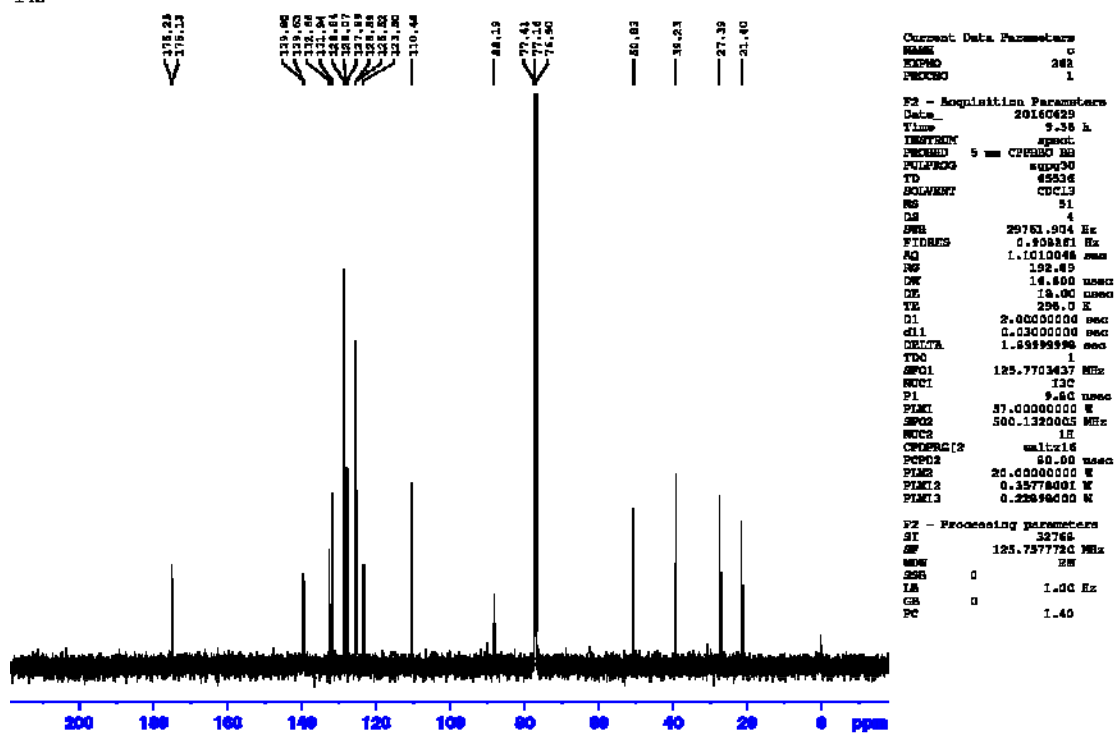

143

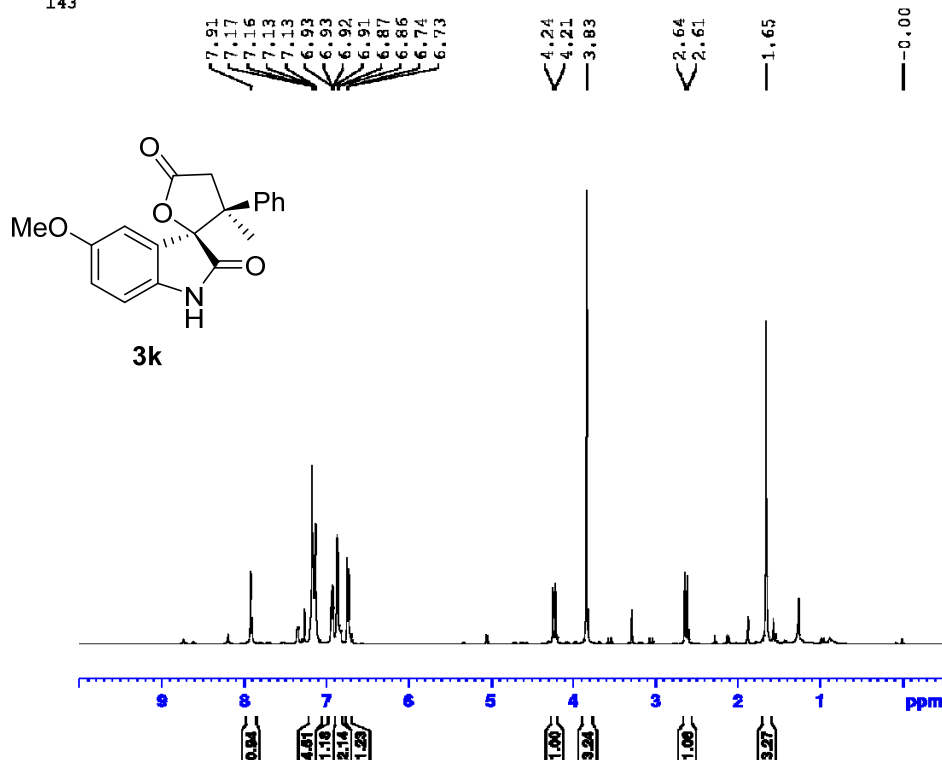

143

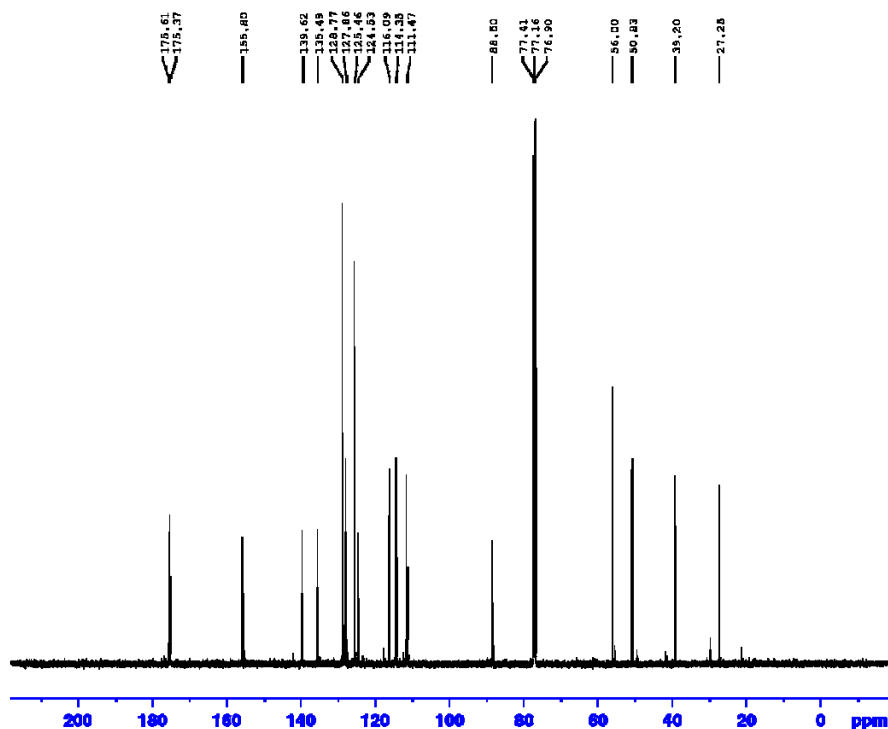

144

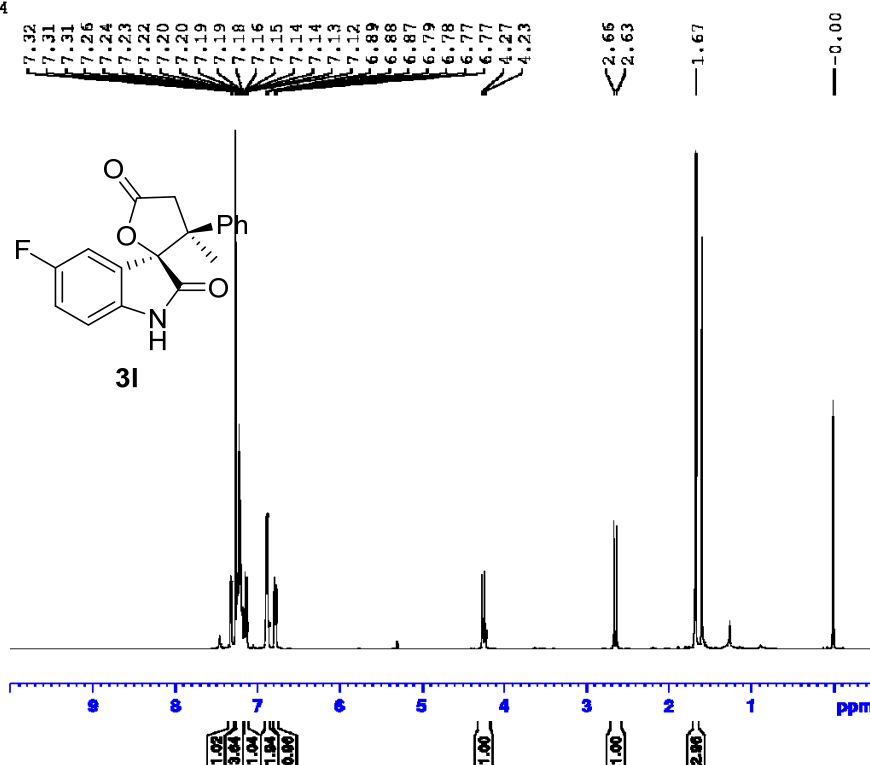

Current Data Parameters  
NAME c  
EXPNO 265  
PROCNO 1

F2 - Acquisition Parameters  
Date\_ 20160704  
Time 20.25 h  
INSTRUM spect  
PROBHD 5 mm CPBBO BB  
PULPROG zg30  
TD 65536  
SOLVENT CDCl3  
NS 16  
DS 2  
SWH 10000.000 Hz  
FIDRES 0.305176 Hz  
AQ 3.2767999 sec  
RG 77.18  
DW 50.000 usec  
DE 6.50 usec  
TE 298.0 K  
D1 1.00000000 sec  
TD0 1  
SFO1 500.1330885 MHz  
NUC1 1H  
P1 10.60 usec  
PLM1 20.00000000 W

F2 - Processing parameters  
SI 65536  
SF 500.1300115 MHz  
WDW EM  
SSB 0  
LB 0.30 Hz  
GB 0  
PC 1.00

144

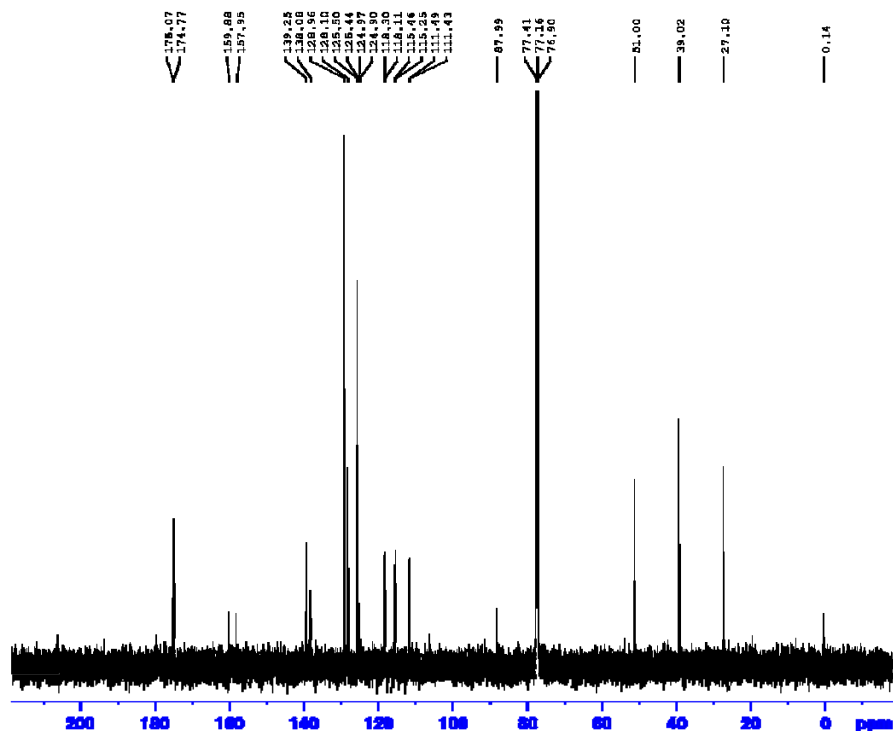

Current Data Parameters  
NAME c  
EXPNO 265  
PROCNO 1

F2 - Acquisition Parameters  
Date\_ 20160704  
Time 20.28 h  
INSTRUM spect  
PROBHD 5 mm CPBBO BB  
PULPROG zgpg30  
TD 65536  
SOLVENT CDCl3  
NS 63  
DS 4  
SWH 29761.904 Hz  
FIDRES 0.908261 Hz  
AQ 1.1010048 sec  
RG 192.89  
DW 16.800 usec  
DE 18.40 usec  
TE 298.0 K  
D1 2.00000000 sec  
d11 0.03000000 sec  
DELTA 1.89999998 sec  
TD0 1  
SFO1 125.7703637 MHz  
NUC1 13C  
P1 9.80 usec  
PLM1 57.00000000 W  
SFO2 500.1320005 MHz  
NUC2 1H  
PCPD2 wait15  
PLF2 20.00000000 W  
PLF12 0.35778001 W  
PLF13 0.22894000 W

F2 - Processing parameters  
SI 32768  
SF 125.7577720 MHz  
WDW EM  
SSB 0  
LB 1.00 Hz  
GB 0  
PC 1.40

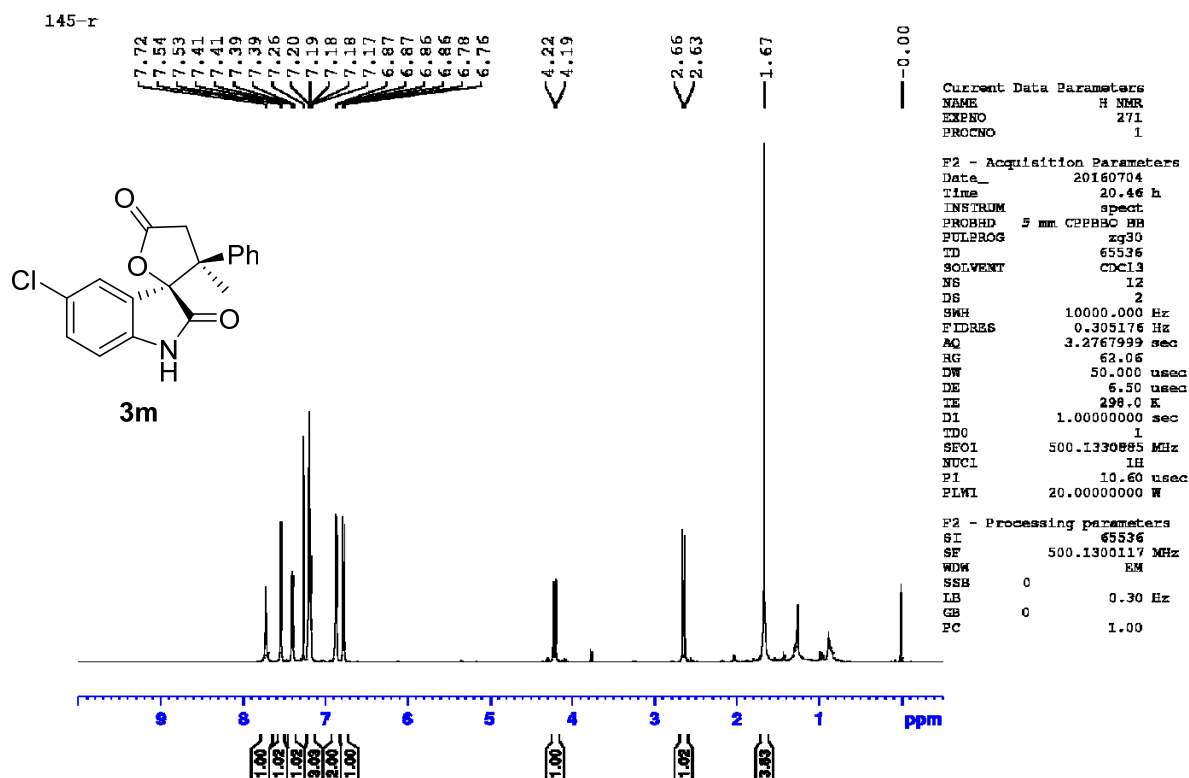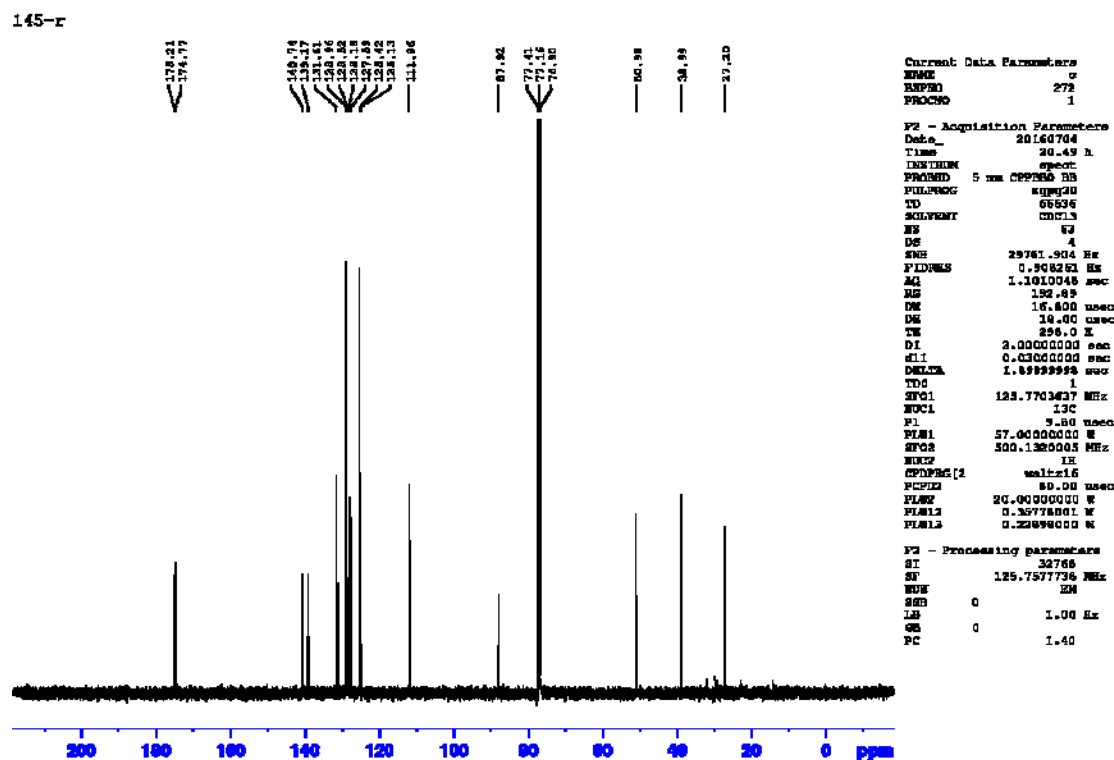

146

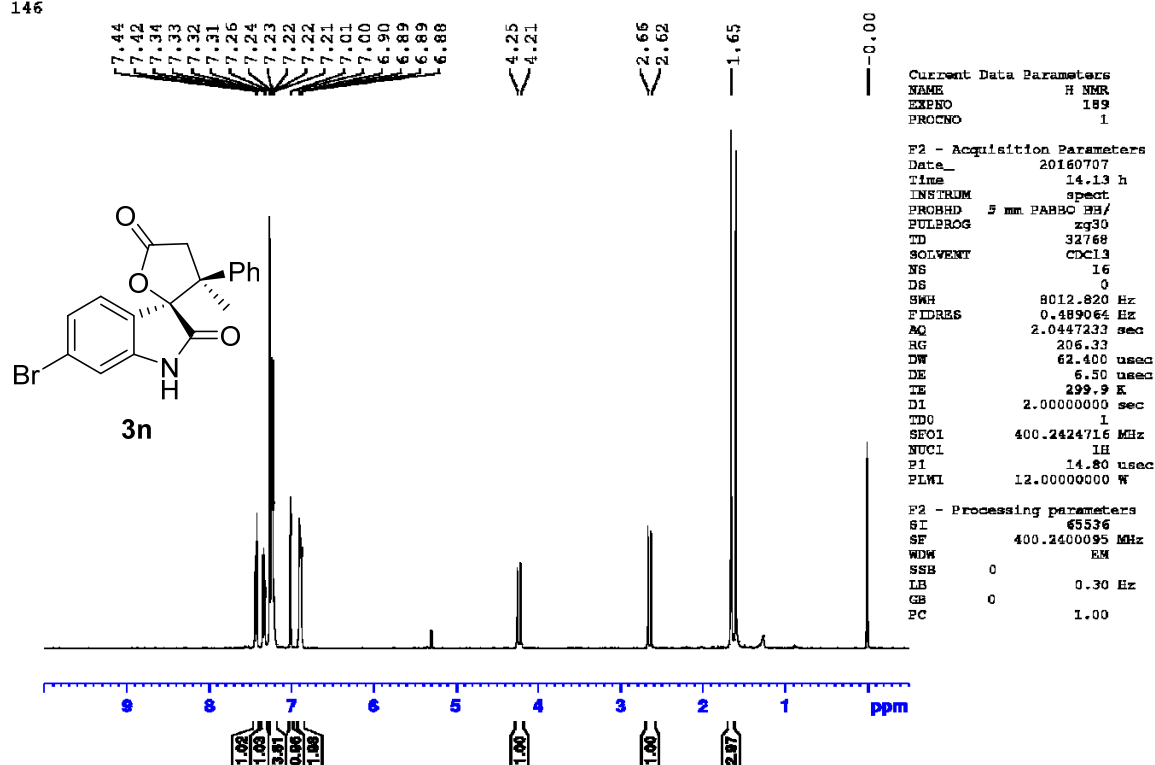

146

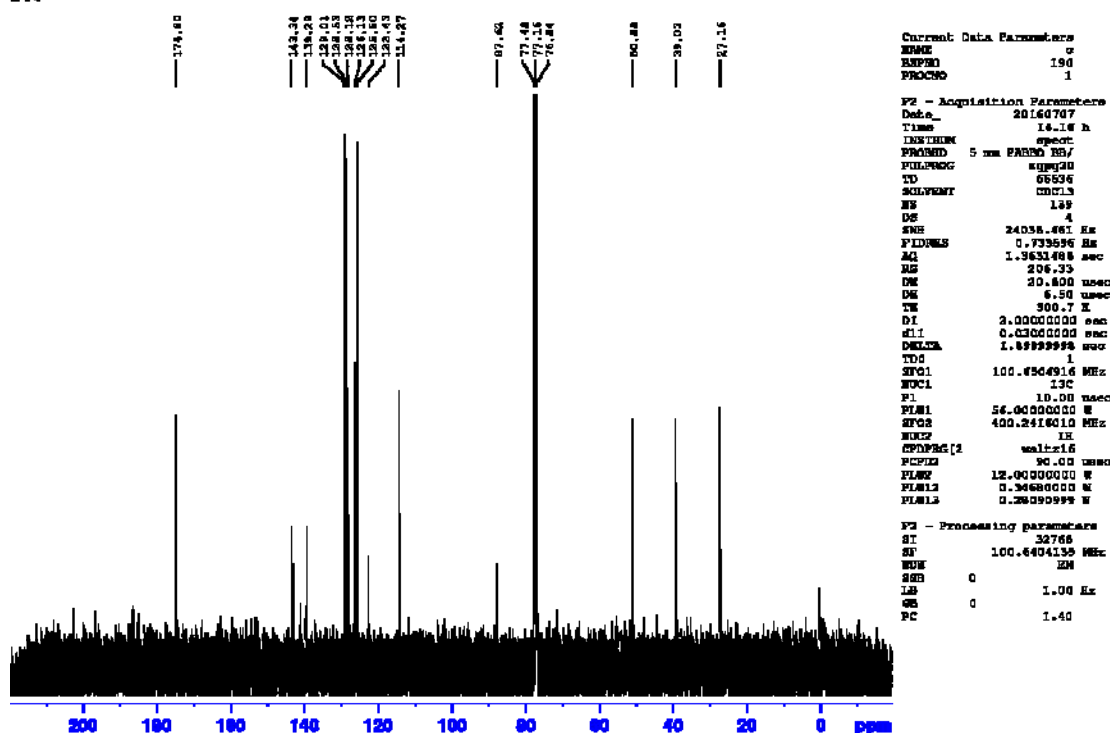

147-z

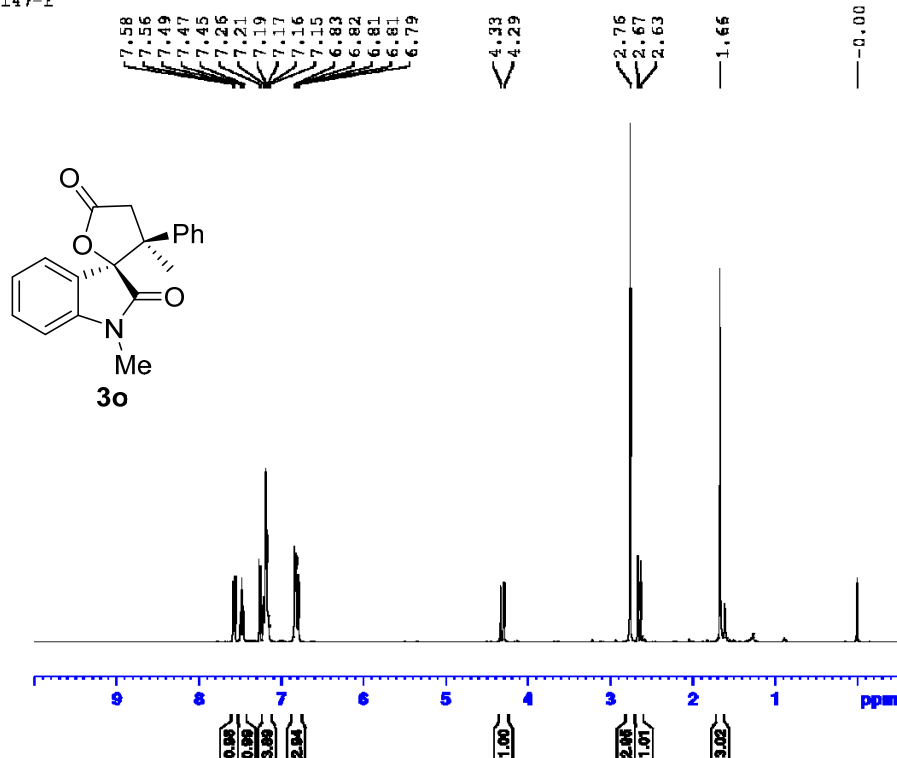

Current Data Parameters  
NAME H NMR  
EXPNO 220  
PROCNO 1

F2 - Acquisition Parameters  
Date\_ 20160811  
Time 15.50 h  
INSTRUM spect  
PROBHD 5 mm PABBO BB/  
PULPROG zg30  
TD 32768  
SOLVENT CDCl3  
NS 15  
DS 0  
SWH 8012.820 Hz  
FIDRES 0.489064 Hz  
AQ 2.0447233 sec  
RG 102.73  
DW 62.400 usec  
DE 6.50 usec  
TE 300.3 K  
D1 2.00000000 sec  
TD0 1  
SFO1 400.2424716 MHz  
NUC1 1H  
P1 14.80 usec  
PLW1 12.00000000 W

F2 - Processing parameters  
SI 65536  
SF 400.2400093 MHz  
WDW EM  
SSB 0  
LB 0.30 Hz  
GB 0  
PC 1.00

147-z

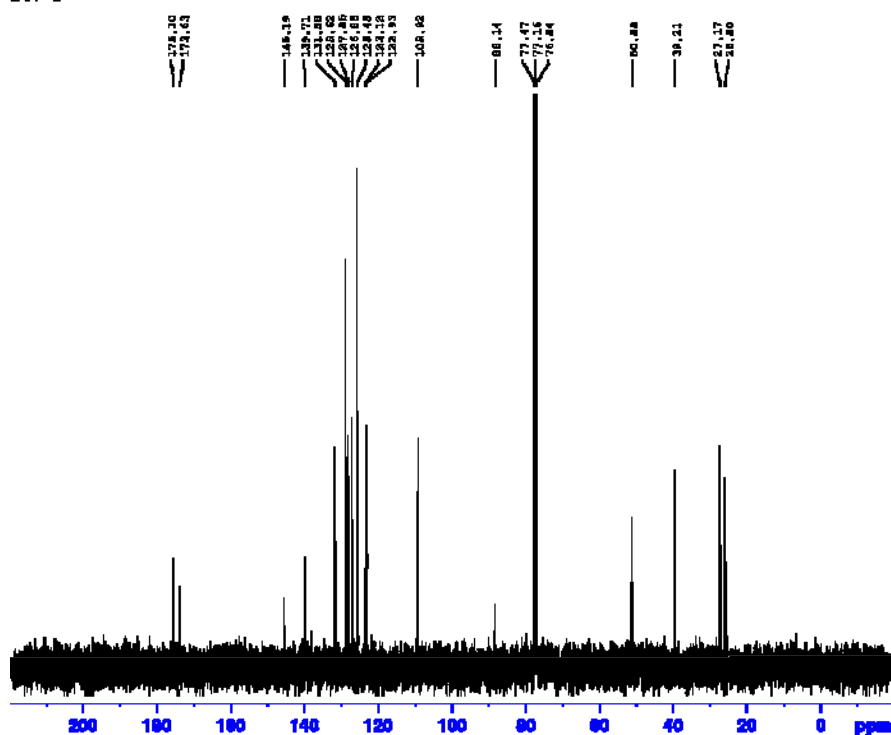

Current Data Parameters  
NAME c  
EXPNO 221  
PROCNO 1

F2 - Acquisition Parameters  
Date\_ 20160811  
Time 15.52 h  
INSTRUM spect  
PROBHD 5 mm PABBO BB/  
PULPROG zgpg30  
TD 65536  
SOLVENT CDCl3  
NS 22  
DS 4  
SWH 24058.861 Hz  
FIDRES 0.738696 Hz  
AQ 1.3631488 sec  
RG 206.33  
DW 20.800 usec  
DE 6.50 usec  
TE 300.3 K  
D1 2.00000000 sec  
d11 0.03000000 sec  
DELTA 1.89999999 sec  
TD0 1  
SFO1 100.6264916 MHz  
NUC1 13C  
P1 10.00 usec  
PLW1 56.00000000 W  
SFO2 400.2416010 MHz  
NUC2 1H  
SFOFREQ[2] waltz16  
PCP22 90.00 usec  
PLW2 12.00000000 W  
PLW12 0.34680000 W  
PLW13 0.38899999 W

F2 - Processing parameters  
SI 32768  
SF 100.6404161 MHz  
WDW EM  
SSB 0  
LB 1.00 Hz  
GB 0  
PC 1.40



## Part II HPLC Spectra

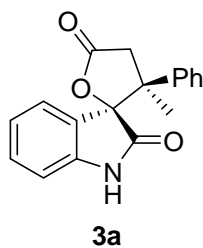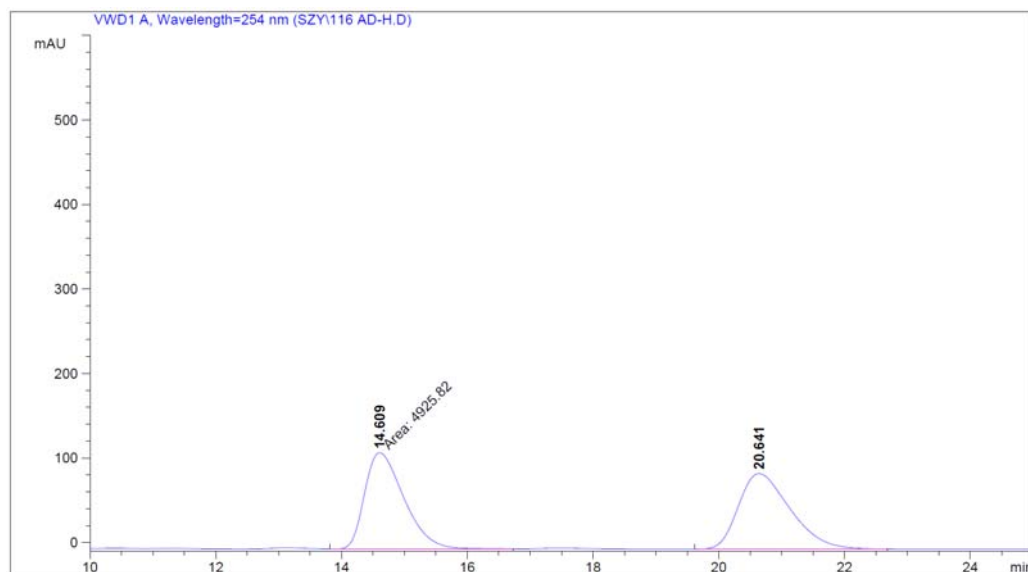

| Peak # | RetTime [min] | Type | Width [min] | Area mAU * s | Height [mAU] | Area %  |
|--------|---------------|------|-------------|--------------|--------------|---------|
| 1      | 14.609        | MM   | 0.7212      | 4925.81982   | 113.83202    | 49.2359 |
| 2      | 20.641        | BB   | 0.8848      | 5078.70996   | 89.30438     | 50.7641 |

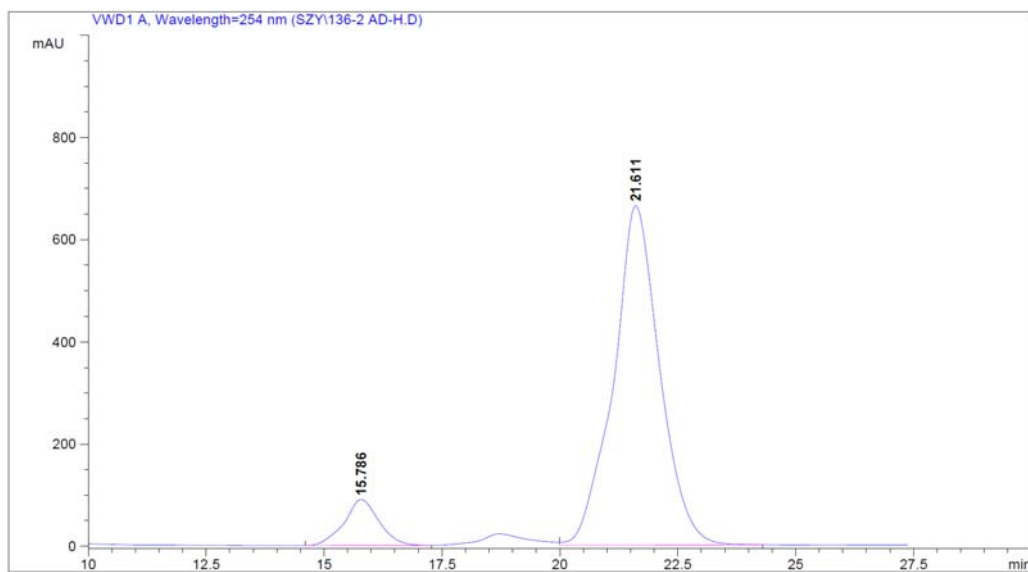

| Peak # | RetTime [min] | Type | Width [min] | Area mAU * s | Height [mAU] | Area %  |
|--------|---------------|------|-------------|--------------|--------------|---------|
| 1      | 15.786        | BV   | 0.7574      | 4637.69922   | 90.15678     | 9.2877  |
| 2      | 21.611        | VB   | 0.9912      | 4.52963e4    | 663.78375    | 90.7123 |

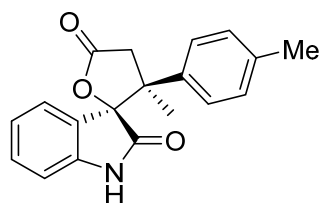

**3b**

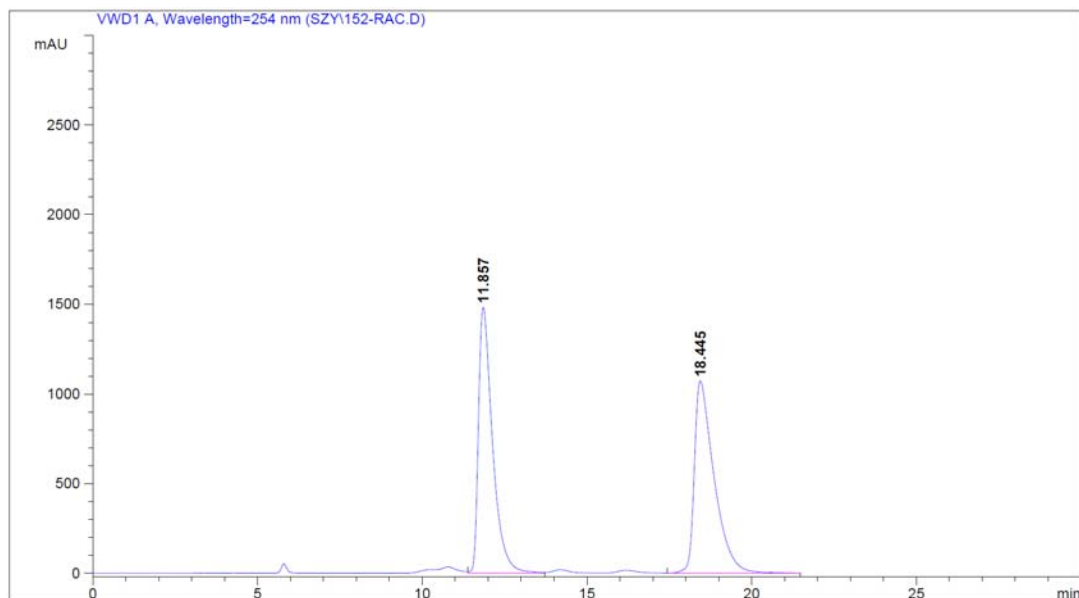

| Peak # | RetTime [min] | Type | Width [min] | Area mAU *s | Height [mAU] | Area %  |
|--------|---------------|------|-------------|-------------|--------------|---------|
| 1      | 11.857        | VV   | 0.4494      | 4.41399e4   | 1482.06738   | 49.6193 |
| 2      | 18.445        | VBA  | 0.6119      | 4.48172e4   | 1074.32593   | 50.3807 |

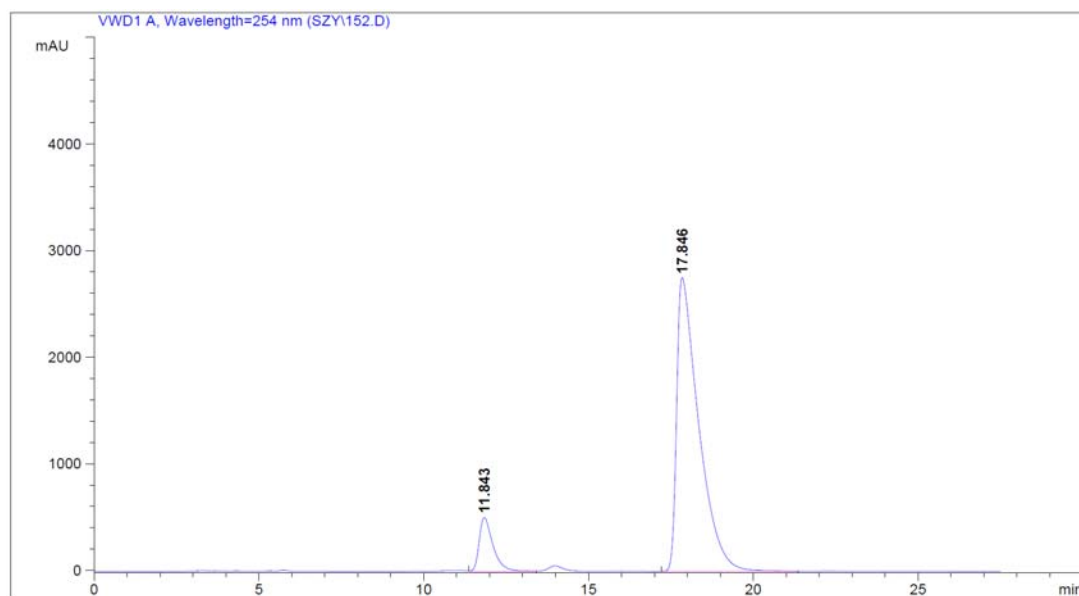

| Peak # | RetTime [min] | Type | Width [min] | Area mAU *s | Height [mAU] | Area %  |
|--------|---------------|------|-------------|-------------|--------------|---------|
| 1      | 11.843        | VV   | 0.4344      | 1.47241e4   | 505.66925    | 10.3571 |
| 2      | 17.846        | BB   | 0.6535      | 1.27441e5   | 2753.64331   | 89.6429 |

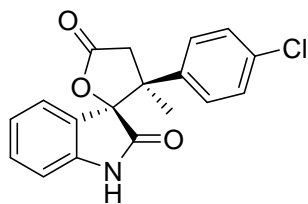

**3c**

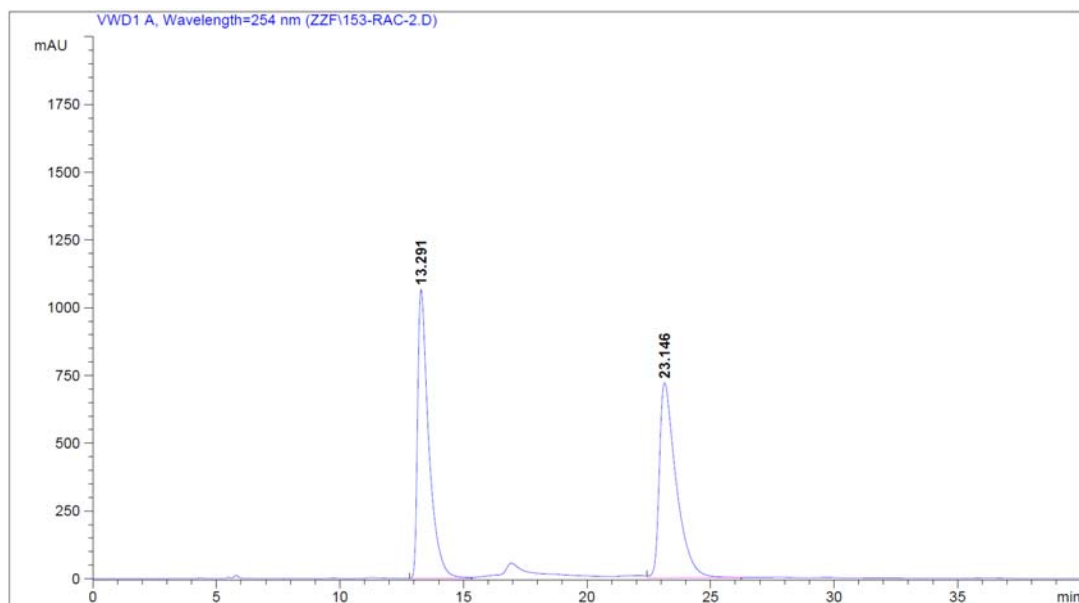

| Peak # | RetTime [min] | Type | Width [min] | Area mAU*s | Height [mAU] | Area %  |
|--------|---------------|------|-------------|------------|--------------|---------|
| 1      | 13.291        | BV   | 0.4618      | 3.34298e4  | 1066.34363   | 49.6720 |
| 2      | 23.146        | VB   | 0.6923      | 3.38713e4  | 719.01141    | 50.3280 |

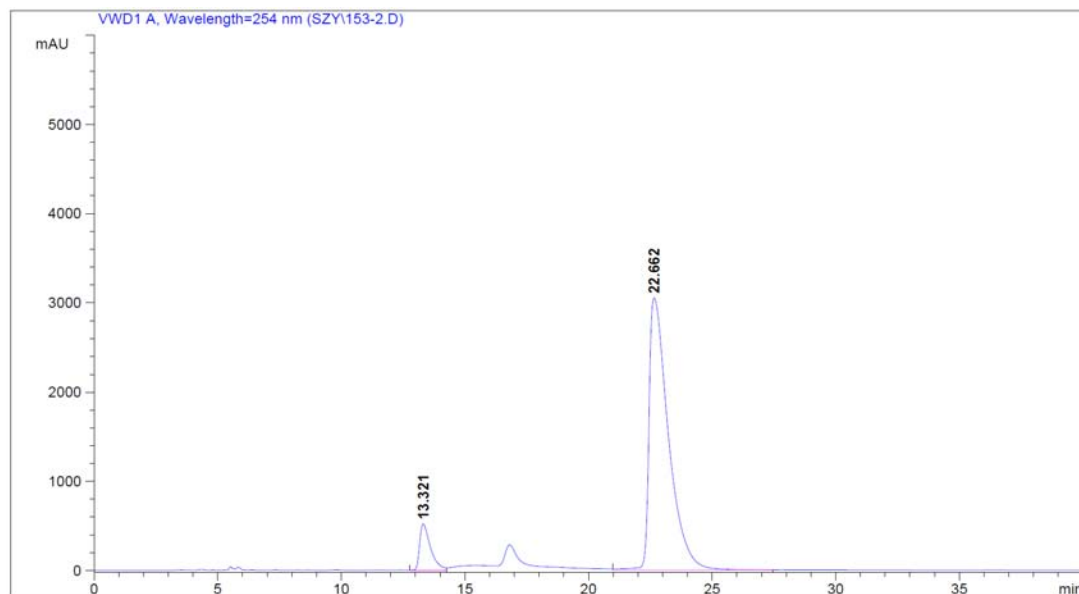

| Peak # | RetTime [min] | Type | Width [min] | Area mAU*s | Height [mAU] | Area %  |
|--------|---------------|------|-------------|------------|--------------|---------|
| 1      | 13.321        | VV   | 0.4550      | 1.58778e4  | 520.35559    | 8.6817  |
| 2      | 22.662        | VB   | 0.8198      | 1.67011e5  | 3048.25000   | 91.3183 |

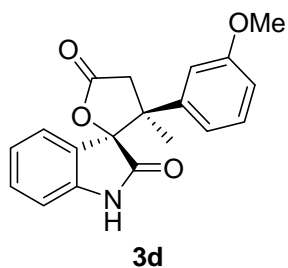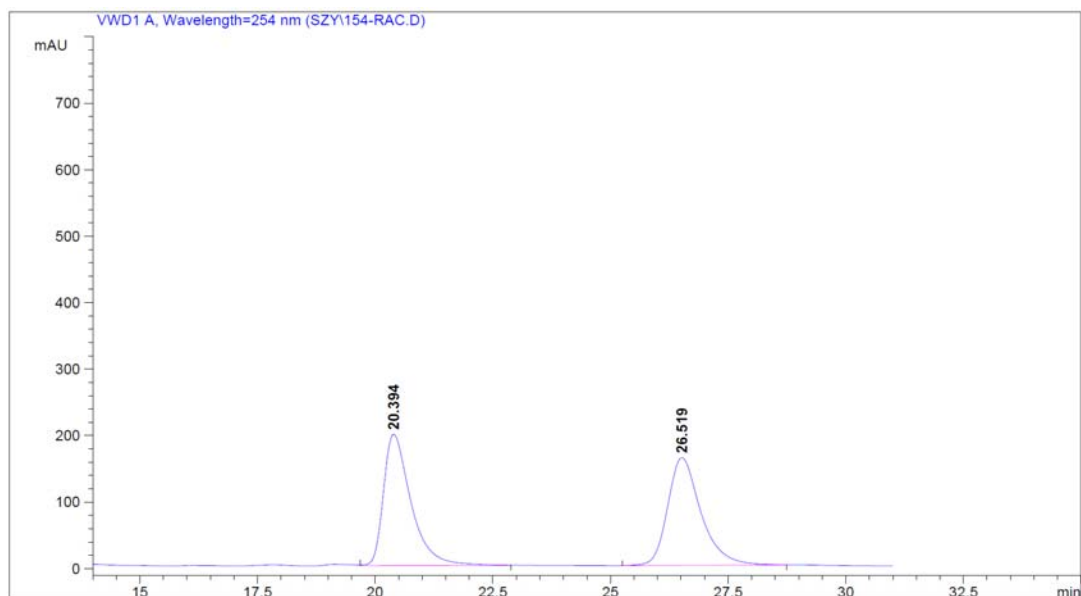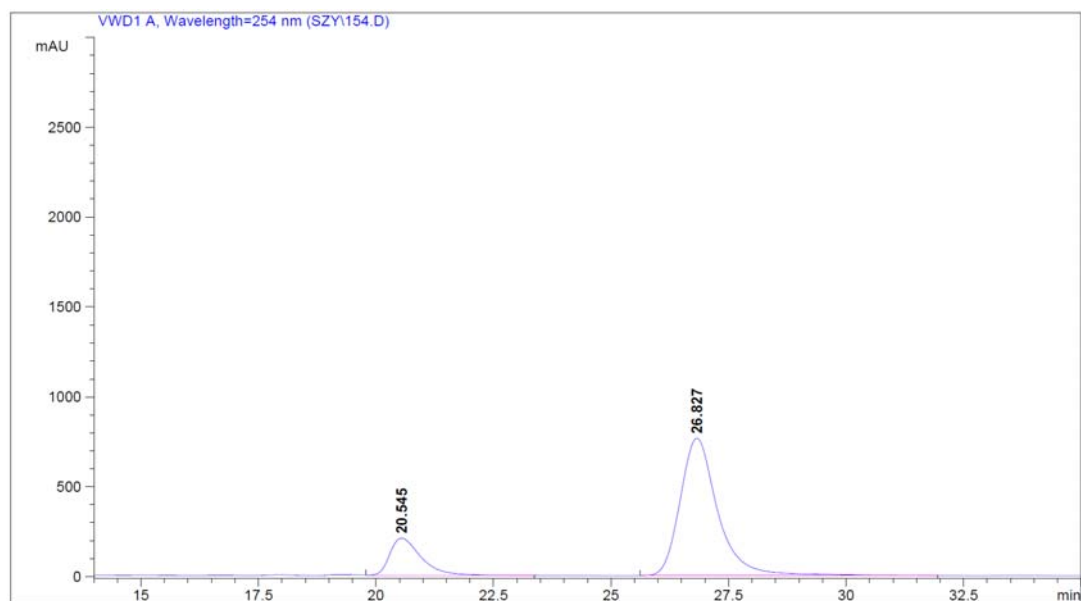

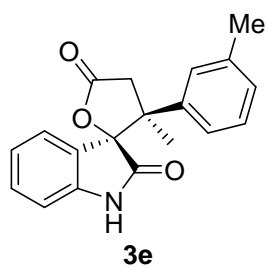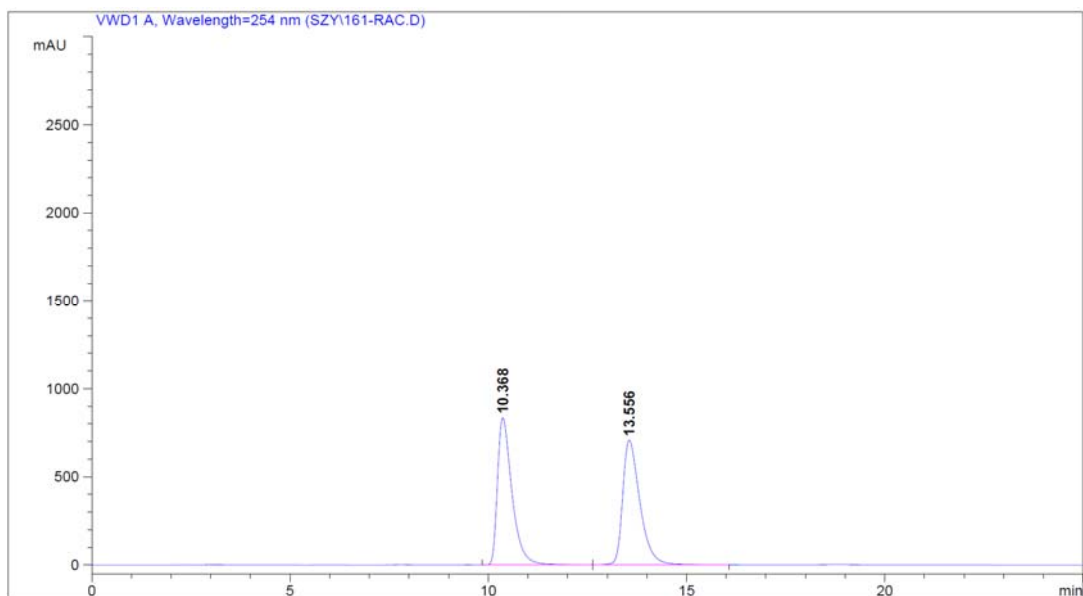

| Peak # | RetTime [min] | Type | Width [min] | Area mAU  | Height [mAU] | Area %  |
|--------|---------------|------|-------------|-----------|--------------|---------|
| 1      | 10.368        | VV   | 0.3875      | 2.12447e4 | 833.81036    | 49.7770 |
| 2      | 13.556        | VB   | 0.4612      | 2.14350e4 | 707.53735    | 50.2230 |

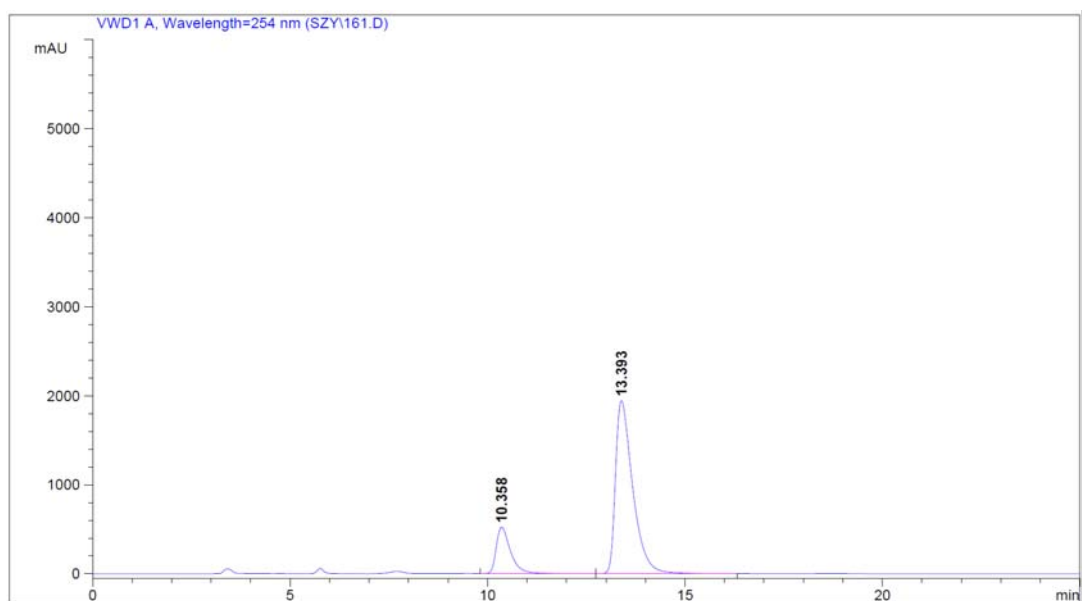

| Peak # | RetTime [min] | Type | Width [min] | Area mAU  | Height [mAU] | Area %  |
|--------|---------------|------|-------------|-----------|--------------|---------|
| 1      | 10.358        | VV   | 0.3837      | 1.34245e4 | 523.35620    | 18.5322 |
| 2      | 13.393        | VB   | 0.4561      | 5.90145e4 | 1944.18701   | 81.4678 |

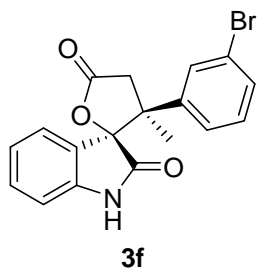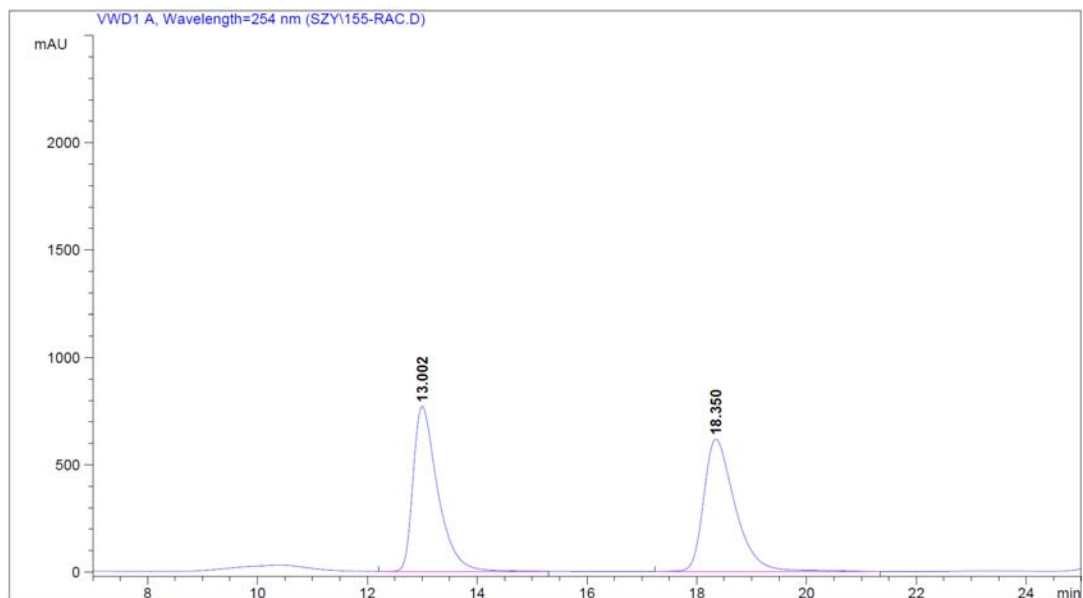

| Peak # | RetTime [min] | Type | Width [min] | Area mAU*s | Height [mAU] | Area %  |
|--------|---------------|------|-------------|------------|--------------|---------|
| 1      | 13.002        | VB   | 0.4679      | 2.39556e4  | 769.84241    | 49.4146 |
| 2      | 18.350        | BB   | 0.6019      | 2.45232e4  | 617.10406    | 50.5854 |

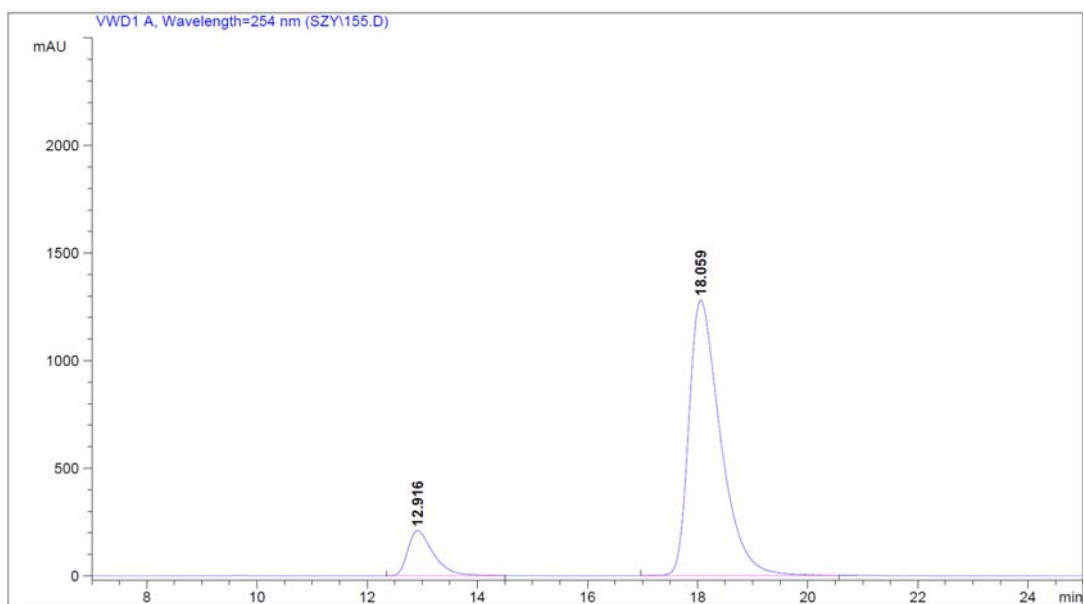

| Peak # | RetTime [min] | Type | Width [min] | Area mAU*s | Height [mAU] | Area %  |
|--------|---------------|------|-------------|------------|--------------|---------|
| 1      | 12.916        | BB   | 0.4834      | 6710.67236 | 209.22375    | 11.6227 |
| 2      | 18.059        | BB   | 0.6021      | 5.10271e4  | 1279.52307   | 88.3773 |

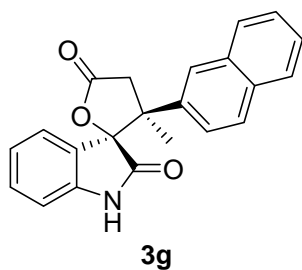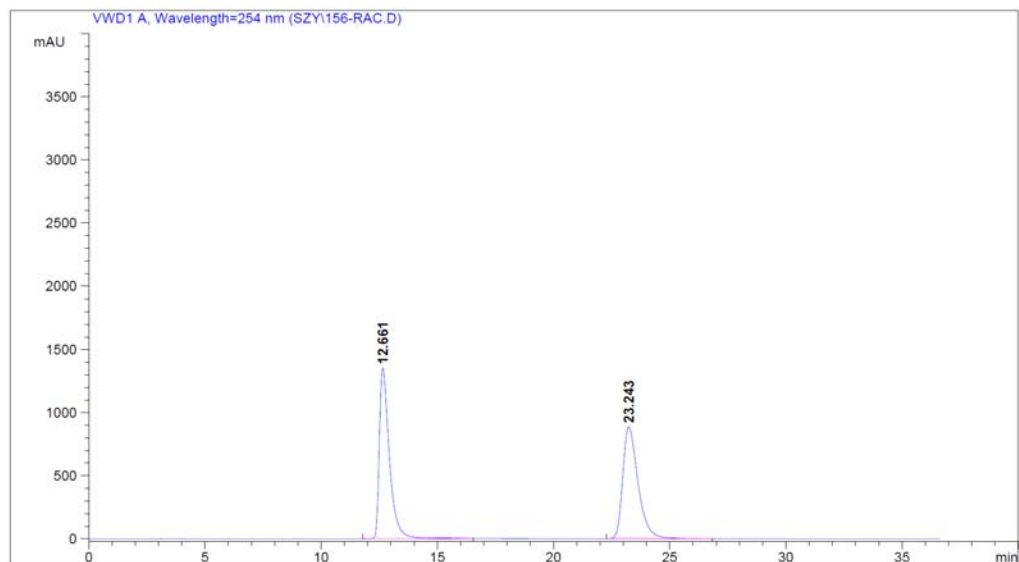

| Peak # | RetTime [min] | Type | Width [min] | Area mAU *s | Height [mAU] | Area %  |
|--------|---------------|------|-------------|-------------|--------------|---------|
| 1      | 12.661        | BB   | 0.4511      | 4.08719e4   | 1354.30322   | 50.1640 |
| 2      | 23.243        | BB   | 0.6973      | 4.06047e4   | 886.82135    | 49.8360 |

**3g** After recrystallization

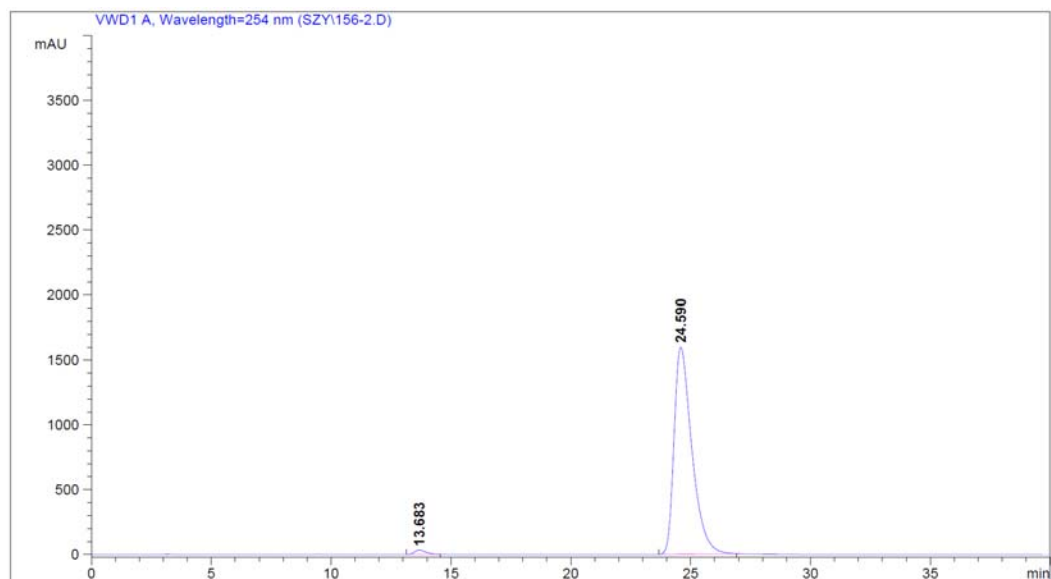

| Peak # | RetTime [min] | Type | Width [min] | Area mAU *s | Height [mAU] | Area %  |
|--------|---------------|------|-------------|-------------|--------------|---------|
| 1      | 13.683        | BB   | 0.5184      | 1160.13171  | 34.04530     | 1.3848  |
| 2      | 24.590        | BB   | 0.7763      | 8.26146e4   | 1598.18567   | 98.6152 |

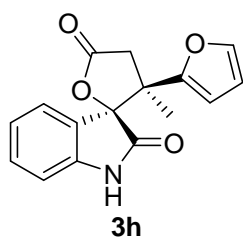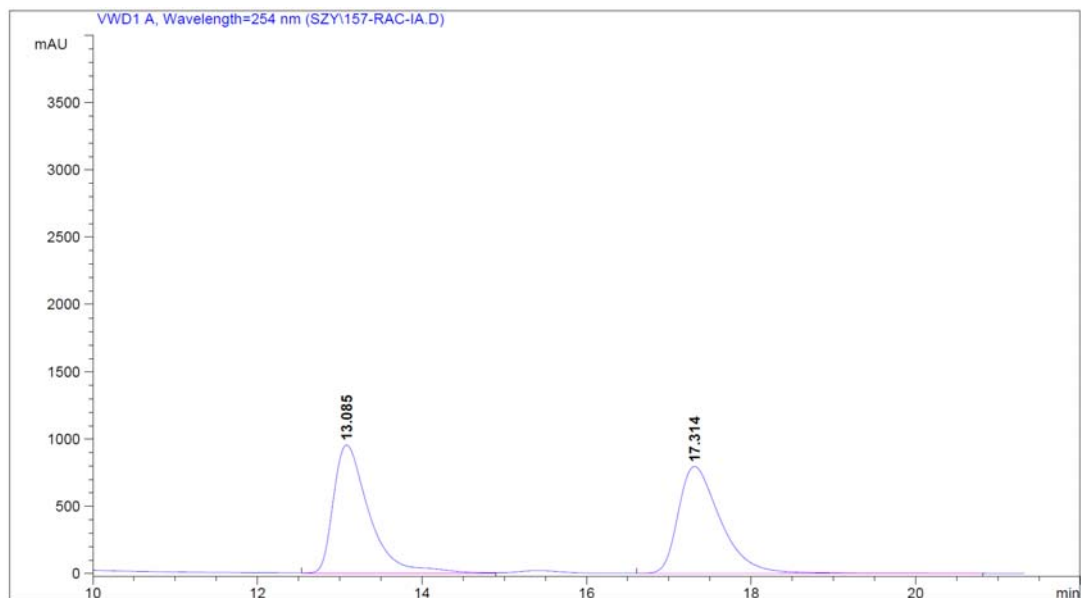

| Peak # | RetTime [min] | Type | Width [min] | Area mAU  | Height [mAU] | Area %  |
|--------|---------------|------|-------------|-----------|--------------|---------|
| 1      | 13.085        | VV   | 0.4601      | 2.91109e4 | 955.92969    | 50.5445 |
| 2      | 17.314        | BB   | 0.5428      | 2.84838e4 | 795.71655    | 49.4555 |

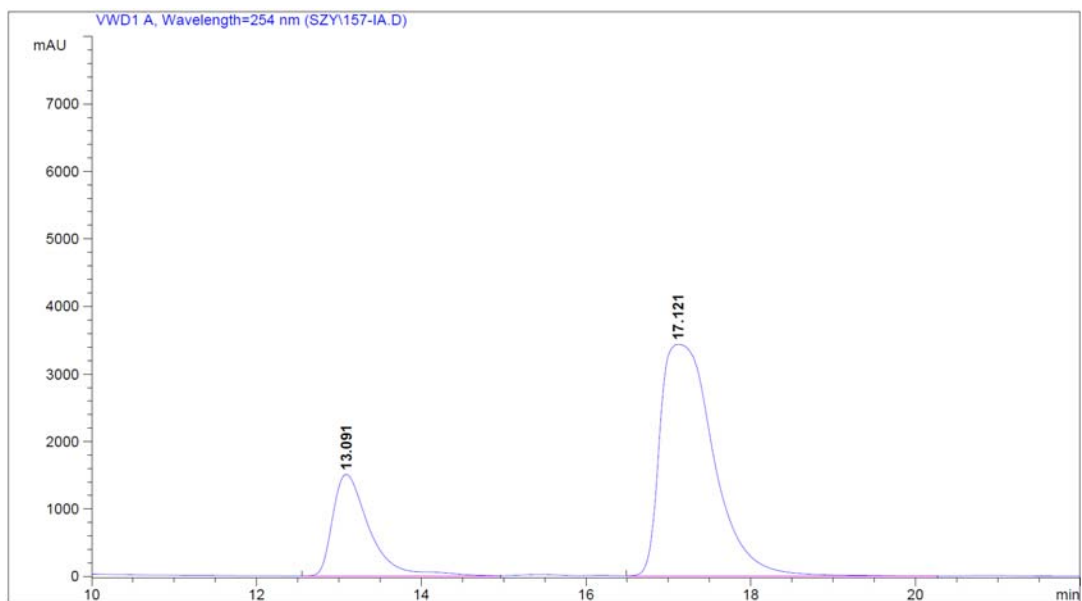

| Peak # | RetTime [min] | Type | Width [min] | Area mAU  | Height [mAU] | Area %  |
|--------|---------------|------|-------------|-----------|--------------|---------|
| 1      | 13.091        | VV   | 0.4752      | 4.72771e4 | 1512.87195   | 23.3100 |
| 2      | 17.121        | VV   | 0.7022      | 1.55541e5 | 3440.24902   | 76.6900 |



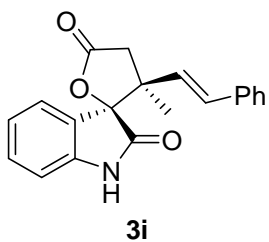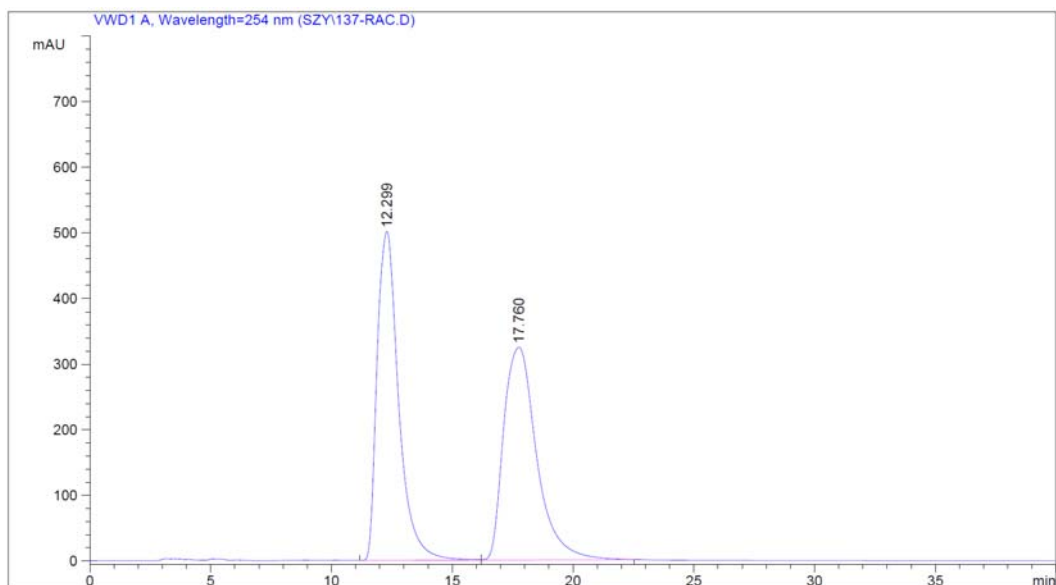

| Peak # | RetTime [min] | Type | Width [min] | Area mAU * s | Height [mAU] | Area %  |
|--------|---------------|------|-------------|--------------|--------------|---------|
| 1      | 12.299        | BV   | 0.9649      | 3.10522e4    | 500.96567    | 50.1359 |
| 2      | 17.760        | VB   | 1.4850      | 3.08839e4    | 324.79883    | 49.8641 |

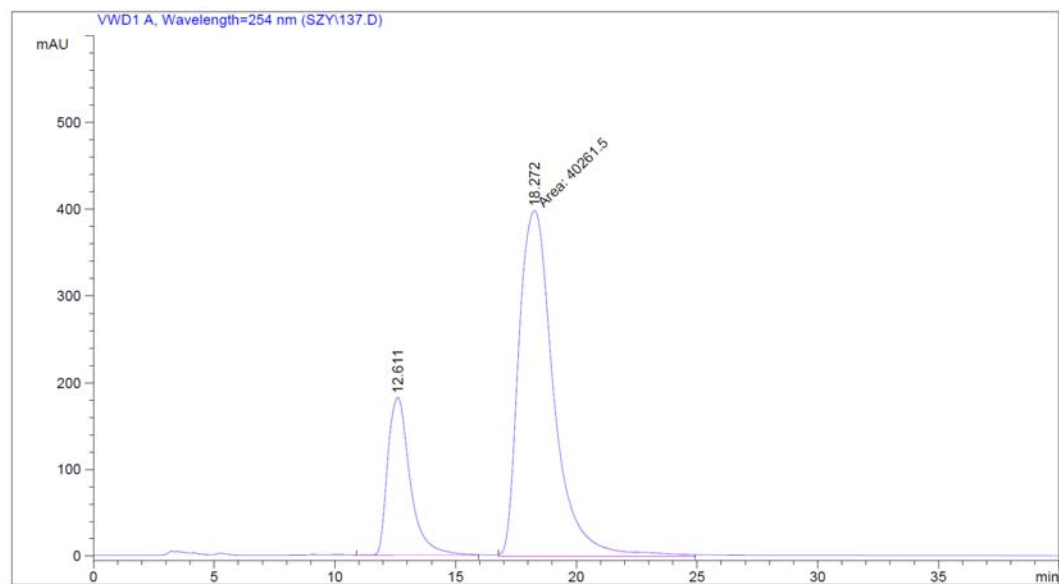

| Peak # | RetTime [min] | Type | Width [min] | Area mAU * s | Height [mAU] | Area %  |
|--------|---------------|------|-------------|--------------|--------------|---------|
| 1      | 12.611        | VB   | 1.0038      | 1.17159e4    | 182.13161    | 22.5404 |
| 2      | 18.272        | MM   | 1.6823      | 4.02615e4    | 398.87576    | 77.4596 |

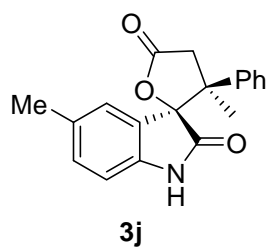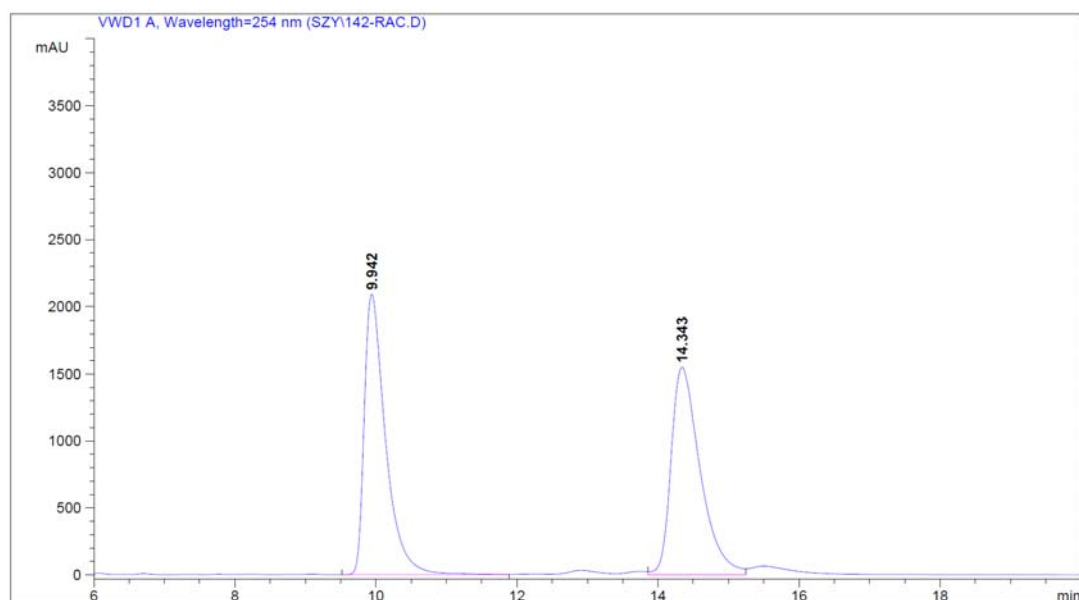

| Peak # | RetTime [min] | Type | Width [min] | Area mAU * s | Height [mAU] | Area %  |
|--------|---------------|------|-------------|--------------|--------------|---------|
| 1      | 9.942         | VV   | 0.3151      | 4.39131e4    | 2089.35205   | 49.8067 |
| 2      | 14.343        | VV   | 0.4322      | 4.42540e4    | 1549.33899   | 50.1933 |

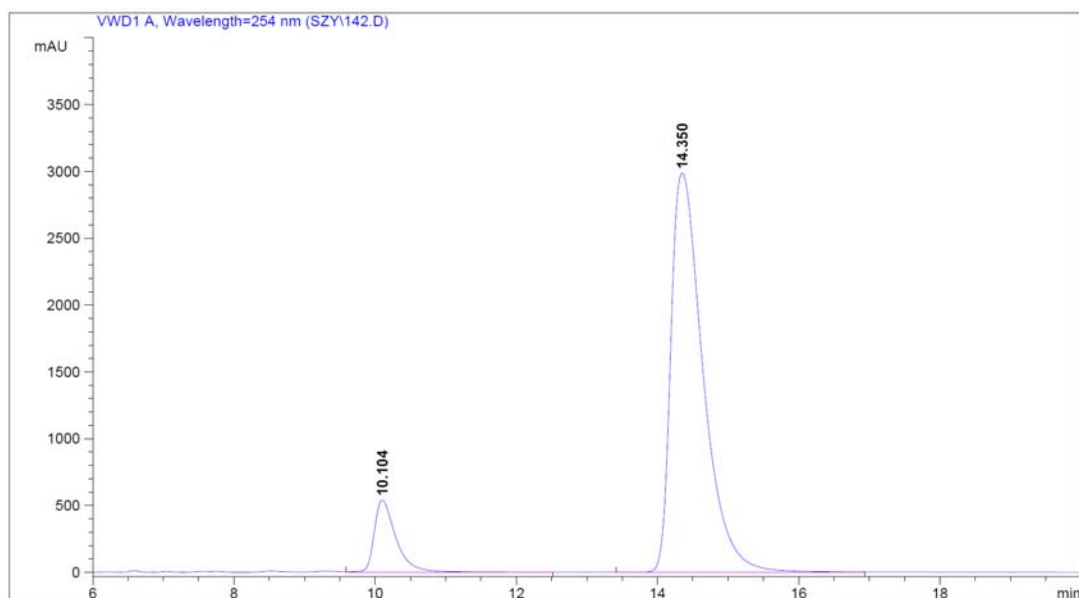

| Peak # | RetTime [min] | Type | Width [min] | Area mAU * s | Height [mAU] | Area %  |
|--------|---------------|------|-------------|--------------|--------------|---------|
| 1      | 10.104        | VB   | 0.3242      | 1.17806e4    | 540.54309    | 11.0712 |
| 2      | 14.350        | VB   | 0.4803      | 9.46264e4    | 2986.71313   | 88.9288 |

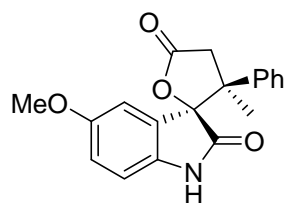

**3k**

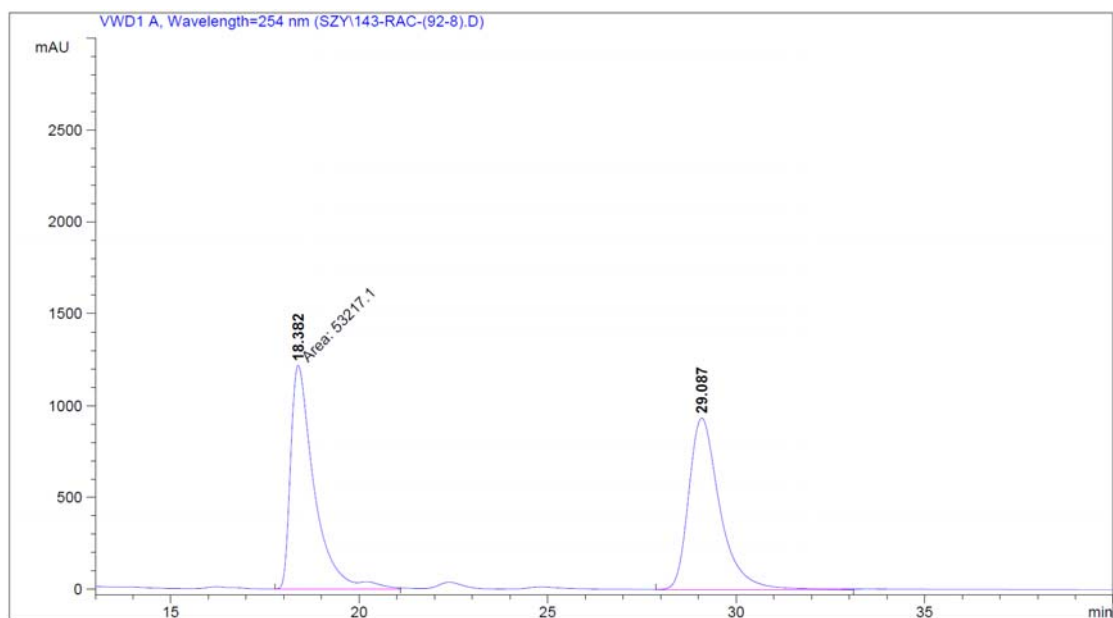

| Peak # | RetTime [min] | Type | Width [min] | Area mAU * s | Height [mAU] | Area %  |
|--------|---------------|------|-------------|--------------|--------------|---------|
| 1      | 18.382        | MM   | 0.7266      | 5.32171e4    | 1220.61145   | 49.7805 |
| 2      | 29.087        | BB   | 0.8739      | 5.36864e4    | 934.74786    | 50.2195 |

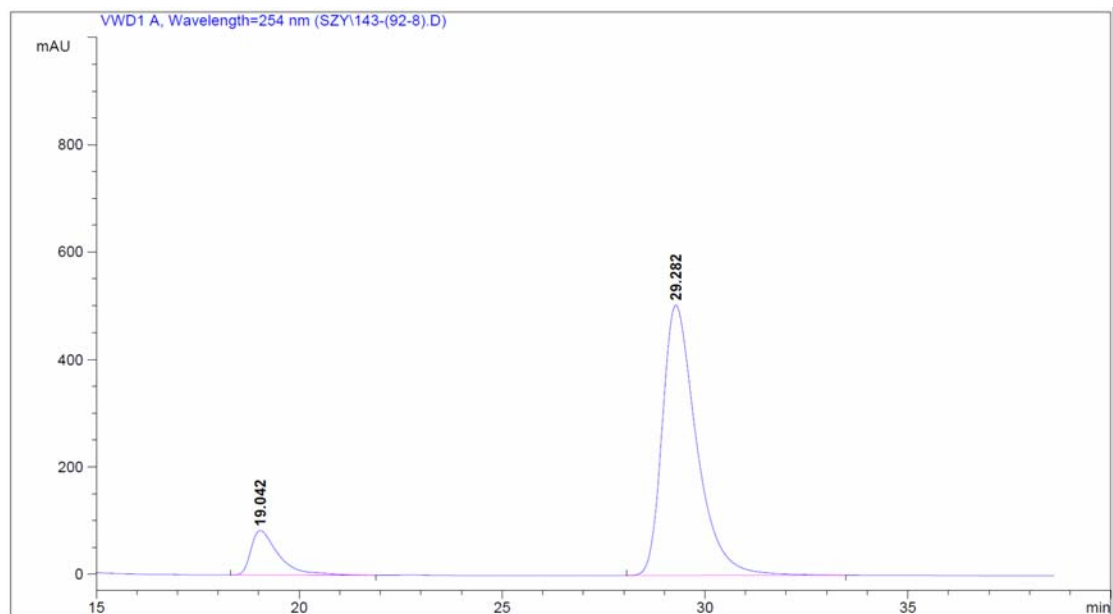

| Peak # | RetTime [min] | Type | Width [min] | Area mAU * s | Height [mAU] | Area %  |
|--------|---------------|------|-------------|--------------|--------------|---------|
| 1      | 19.042        | BB   | 0.7047      | 3937.55835   | 83.03534     | 11.7620 |
| 2      | 29.282        | BB   | 0.8916      | 2.95394e4    | 503.22089    | 88.2380 |

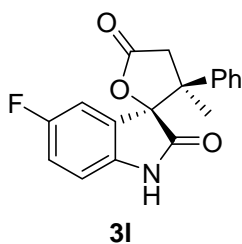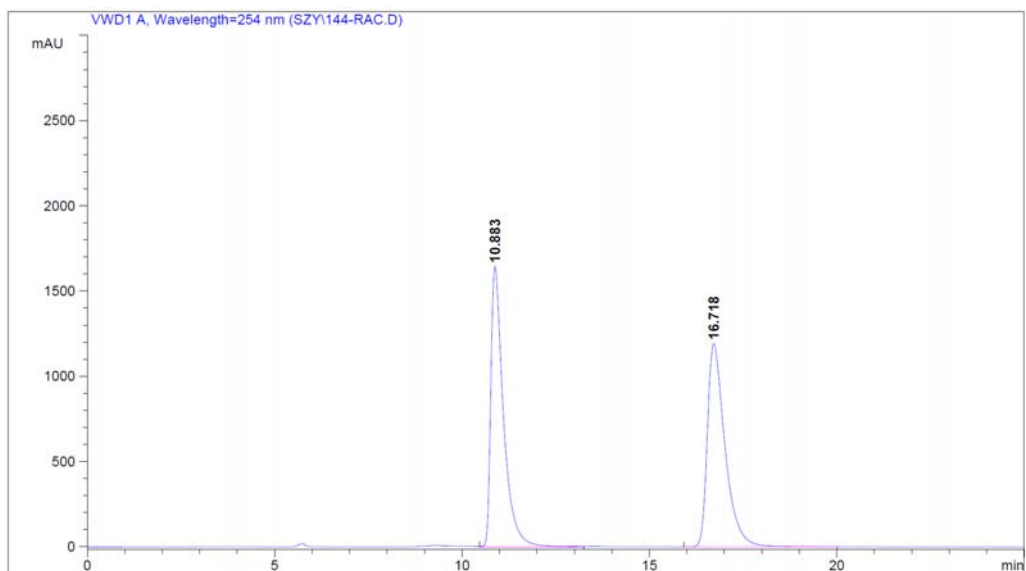

| Peak # | RetTime [min] | Type | Width [min] | Area mAU  | Height [mAU] | Area %  |
|--------|---------------|------|-------------|-----------|--------------|---------|
| 1      | 10.883        | VV   | 0.3465      | 3.85791e4 | 1644.42456   | 49.7182 |
| 2      | 16.718        | VB   | 0.4923      | 3.90164e4 | 1192.74805   | 50.2818 |

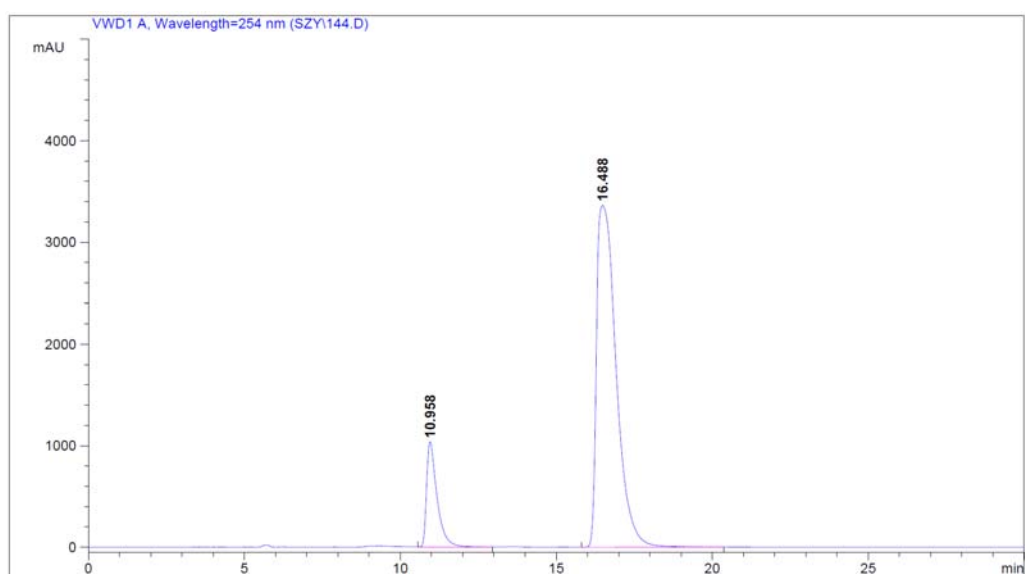

| Peak # | RetTime [min] | Type | Width [min] | Area mAU  | Height [mAU] | Area %  |
|--------|---------------|------|-------------|-----------|--------------|---------|
| 1      | 10.958        | VB   | 0.3509      | 2.45155e4 | 1039.36255   | 14.3208 |
| 2      | 16.488        | VB   | 0.6715      | 1.46673e5 | 3365.31372   | 85.6792 |

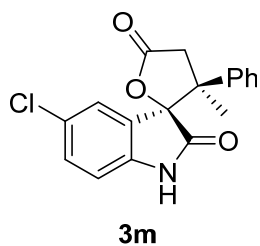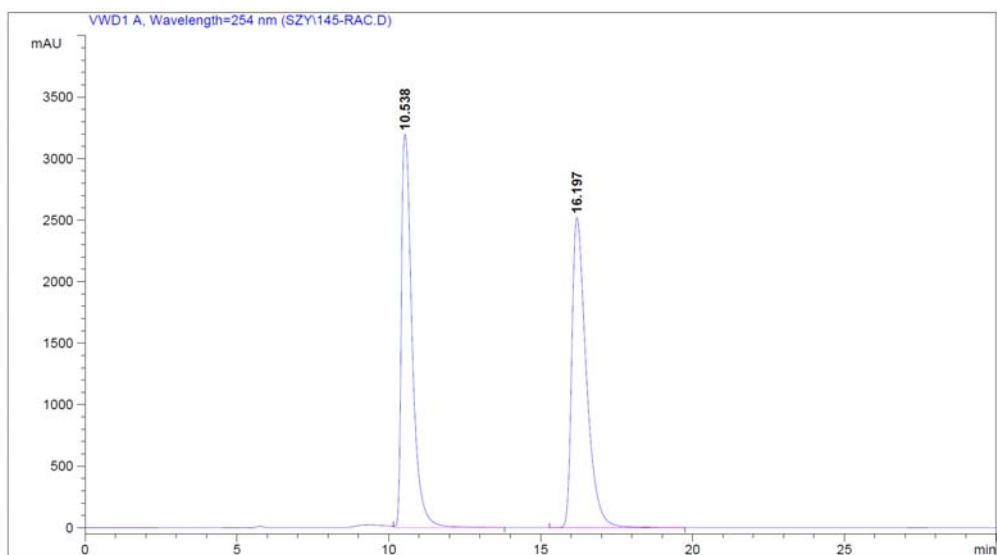

| Peak # | RetTime [min] | Type | Width [min] | Area mAU*s | Height [mAU] | Area %  |
|--------|---------------|------|-------------|------------|--------------|---------|
| 1      | 10.538        | VB   | 0.3719      | 7.87900e4  | 3197.45532   | 48.5832 |
| 2      | 16.197        | BB   | 0.4965      | 8.33855e4  | 2521.00757   | 51.4168 |

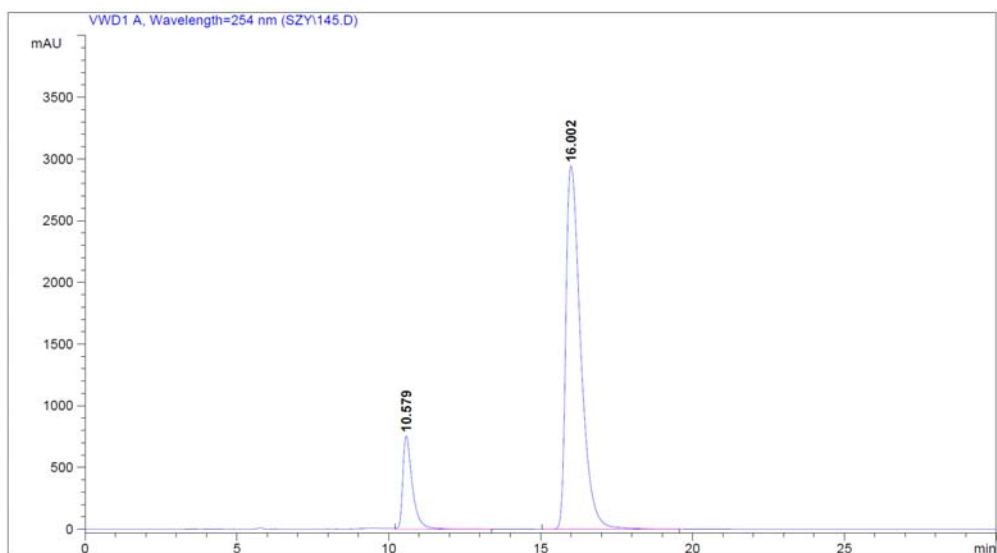

| Peak # | RetTime [min] | Type | Width [min] | Area mAU*s | Height [mAU] | Area %  |
|--------|---------------|------|-------------|------------|--------------|---------|
| 1      | 10.579        | VB   | 0.3291      | 1.65816e4  | 754.81628    | 14.2232 |
| 2      | 16.002        | VB   | 0.5159      | 9.99998e4  | 2942.04370   | 85.7768 |

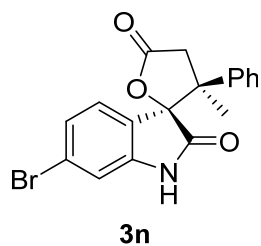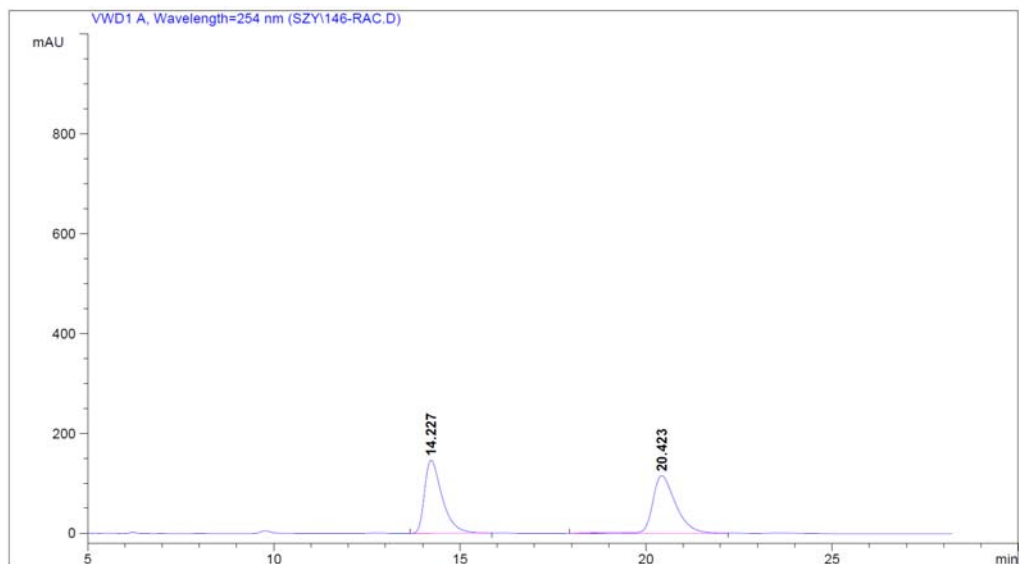

| Peak # | RetTime [min] | Type | Width [min] | Area mAU*s | Height [mAU] | Area %  |
|--------|---------------|------|-------------|------------|--------------|---------|
| 1      | 14.227        | BB   | 0.4971      | 4830.33008 | 146.93402    | 49.1971 |
| 2      | 20.423        | BB   | 0.6486      | 4988.00244 | 115.69173    | 50.8029 |

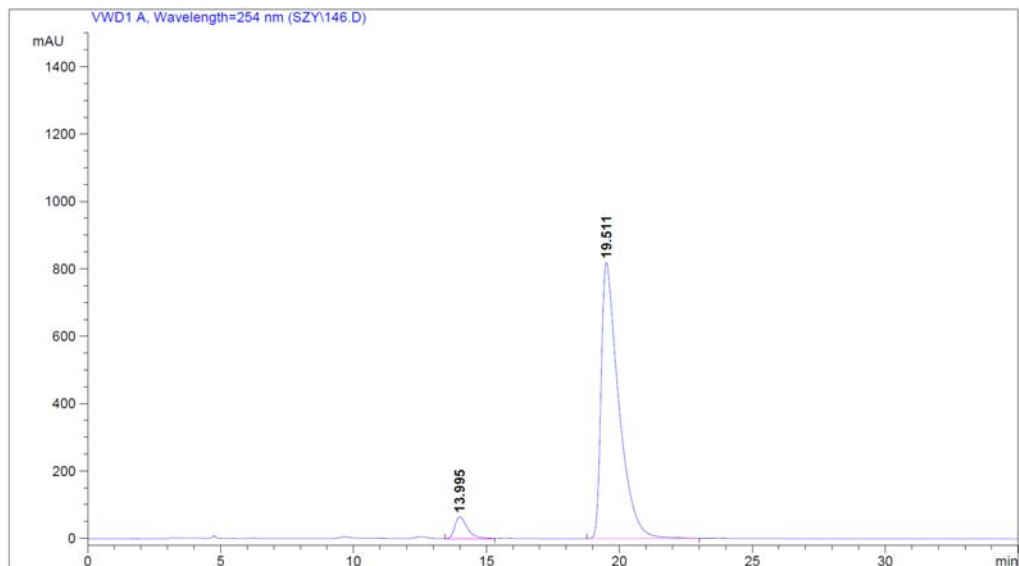

| Peak # | RetTime [min] | Type | Width [min] | Area mAU*s | Height [mAU] | Area %  |
|--------|---------------|------|-------------|------------|--------------|---------|
| 1      | 13.995        | BV   | 0.4987      | 2118.41553 | 64.66824     | 5.3372  |
| 2      | 19.511        | BB   | 0.6689      | 3.75733e4  | 819.39923    | 94.6628 |

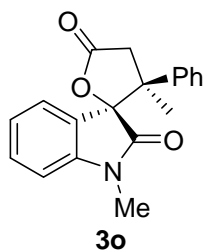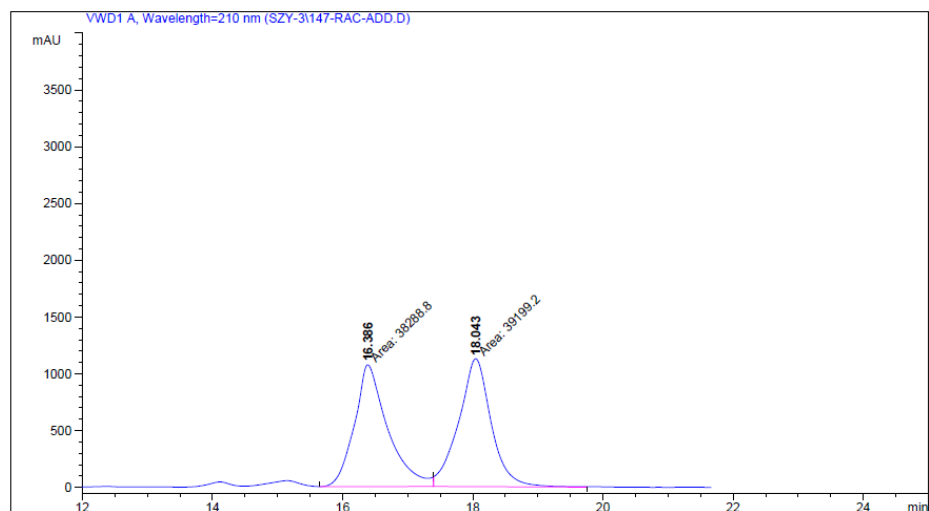

| Peak # | RetTime [min] | Type | Width [min] | Area mAU  | Height [mAU] | Area %  |
|--------|---------------|------|-------------|-----------|--------------|---------|
| 1      | 16.386        | MM   | 0.5943      | 3.82888e4 | 1073.82190   | 49.4125 |
| 2      | 18.043        | MM   | 0.5793      | 3.91992e4 | 1127.84668   | 50.5875 |

Totals : 7.74880e4 2201.66858

**3o** After recrystallization:

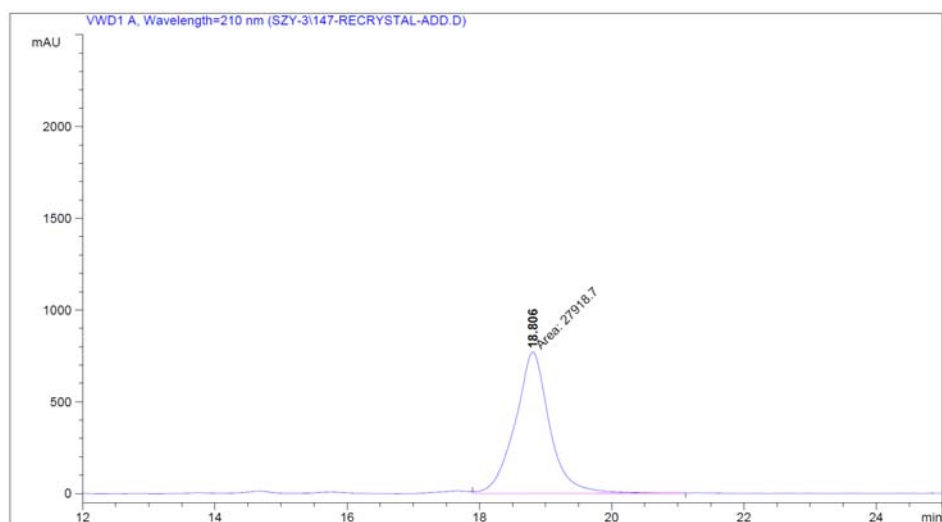

| Peak # | RetTime [min] | Type | Width [min] | Area mAU  | Height [mAU] | Area %   |
|--------|---------------|------|-------------|-----------|--------------|----------|
| 1      | 18.806        | MM   | 0.6036      | 2.79187e4 | 770.92432    | 100.0000 |

Totals : 2.79187e4 770.92432

### Part III X-ray crystallographic data of cycloadduct 3f

Crystals of the compound **3f** were obtained by slow evaporation of a hexane/ethyl acetate solution. *Data Collection.* Measurements were made on a MM007HF Saturn724+ diffractometer equipped with Saturn724+ CCD detector, a Graphite Monochromator with MoK $\alpha$  radiation, Montel mirrors and a Cryostream Plus low temperature device (T = 173K). Full-sphere data collection was used with  $\omega$  and  $\phi$  scans.

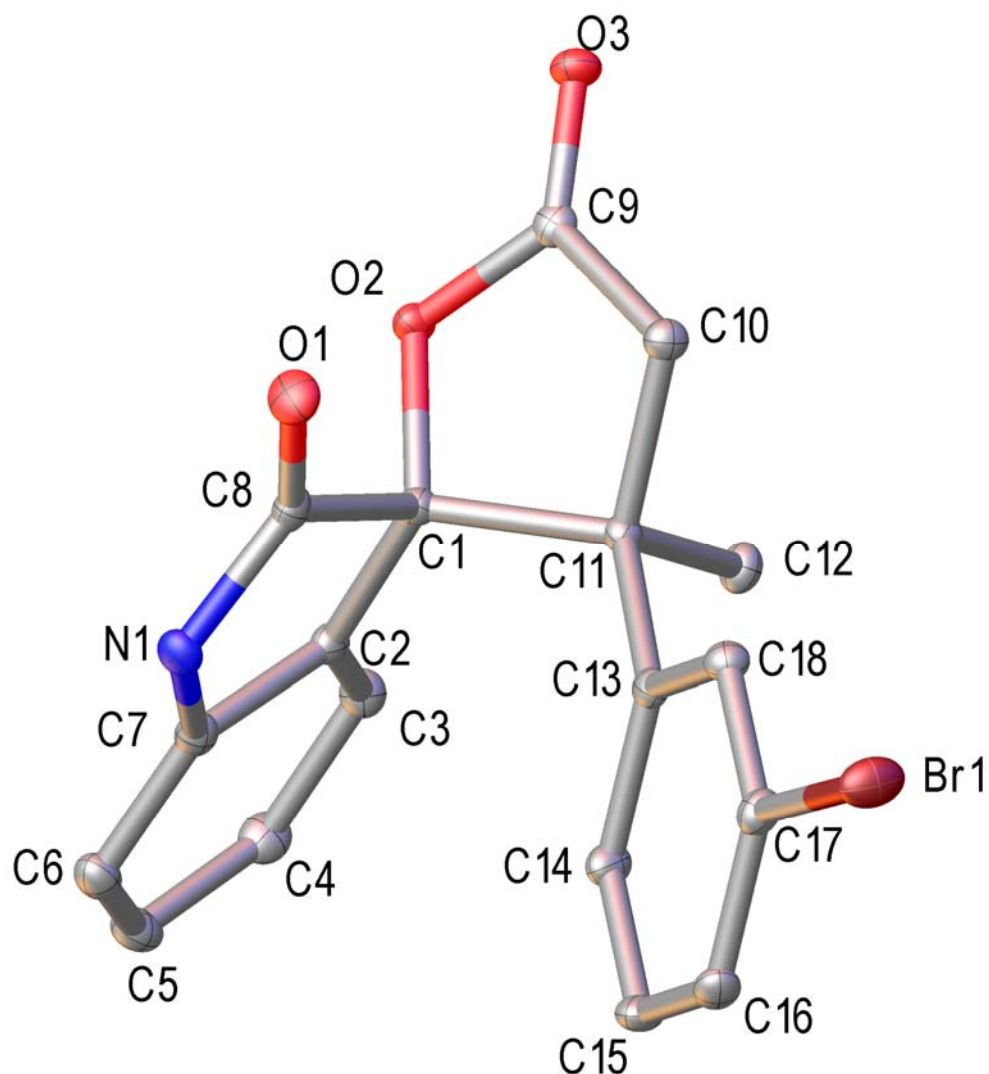

Figure S1 ORTEP of cycloadduct 3f (30% ellipsoid)



**Table 1.** Crystal data and structure refinement for **3f**.

|                                   |                                                     |                 |
|-----------------------------------|-----------------------------------------------------|-----------------|
| Empirical formula                 | C <sub>18</sub> H <sub>14</sub> Br N O <sub>3</sub> |                 |
| Formula weight                    | 372.21                                              |                 |
| Temperature                       | 173.1500 K                                          |                 |
| Wavelength                        | 0.71073 Å                                           |                 |
| Crystal system                    | Monoclinic                                          |                 |
| Space group                       | P 1 2 <sub>1</sub> /c 1                             |                 |
| Unit cell dimensions              | a = 8.351(2) Å                                      | α = 90°.        |
|                                   | b = 10.255(3) Å                                     | β = 98.302(3)°. |
|                                   | c = 18.062(6) Å                                     | γ = 90°.        |
| Volume                            | 1530.7(8) Å <sup>3</sup>                            |                 |
| Z                                 | 4                                                   |                 |
| Density (calculated)              | 1.615 Mg/m <sup>3</sup>                             |                 |
| Absorption coefficient            | 2.700 mm <sup>-1</sup>                              |                 |
| F(000)                            | 752                                                 |                 |
| Crystal size                      | 0.233 x 0.084 x 0.067 mm <sup>3</sup>               |                 |
| Theta range for data collection   | 3.023 to 27.477°.                                   |                 |
| Index ranges                      | -9 ≤ h ≤ 10, -13 ≤ k ≤ 13, -23 ≤ l ≤ 22             |                 |
| Reflections collected             | 9765                                                |                 |
| Independent reflections           | 3464 [R(int) = 0.0400]                              |                 |
| Completeness to theta = 26.000°   | 99.3 %                                              |                 |
| Absorption correction             | Semi-empirical from equivalents                     |                 |
| Max. and min. transmission        | 1.00000 and 0.78393                                 |                 |
| Refinement method                 | Full-matrix least-squares on F <sup>2</sup>         |                 |
| Data / restraints / parameters    | 3464 / 0 / 209                                      |                 |
| Goodness-of-fit on F <sup>2</sup> | 1.135                                               |                 |
| Final R indices [I > 2σ(I)]       | R <sub>1</sub> = 0.0464, wR <sub>2</sub> = 0.0818   |                 |
| R indices (all data)              | R <sub>1</sub> = 0.0542, wR <sub>2</sub> = 0.0848   |                 |
| Extinction coefficient            | n/a                                                 |                 |
| Largest diff. peak and hole       | 0.371 and -0.395 e.Å <sup>-3</sup>                  |                 |
